# Supplementary material for: Transcriptomic analysis of nonylphenol effect on Saccharomyces cerevisiae
Source: PeerJ. 2021 Feb 11;9:e10794. doi: 10.7717/peerj.10794 (PMC7882136; doi:10.7717/peerj.10794)
Supplement: Supplemental Information 1 [file peerj-09-10794-s001.xlsx]

## Sheet: Sayfa1
Supplementary Material 1. Number of dead cells upon exposure to various NP concentrations
	1st cycle	5th cycle	10th cycle	20th cycle	40th cycle
Control 1	2	1	-	1	-
Control 2	-	-	-	-	3
Control 3	-	-	-	-	-
0,1 mg/L_1	1	-	-	1	-
0,1 mg/L_2	-	-	-	1	2
0,1 mg/L_3	-	1	-	-	-
1 mg/L_1	-	-	1	2	-
1 mg/L_2	-	-	-	-	1
1 mg/L_3	1	-	-	1	2
2 mg/L_1	2	-	1	-	1
2 mg/L_2	-	-	-	-	-
2 mg/L_3	-	-	-	-	-
