# Supplementary material for: Transcriptomic analysis of nonylphenol effect on Saccharomyces cerevisiae
Source: PeerJ. 2021 Feb 11;9:e10794. doi: 10.7717/peerj.10794 (PMC7882136; doi:10.7717/peerj.10794)
Supplement: Supplemental Information 2 [file peerj-09-10794-s002.xlsx]

## Sheet: Sheet1
Supplementary Material 2: The complete list of differentially expressed genes in Saccharomyces cerevisiae exposed to 2 mg/L NP
Downregulated					Upregulated
Gene	PValue	FDR Set up	Fold change		Gene	PValue	FDR Set up	Fold change
PRM6	0.00042074	0.014214	-24.8728		TAR1	0.00319909	0.0304926	378.768
FIG1	0.000153794	0.0105652	-20.0231		CHA1	6.12385e-09	3.68472e-05	46.1556
TDA6	3.19134e-06	0.00245945	-13.8887		YGR115C	0.000598267	0.015999	13.3204
CDA1	0.000100138	0.00985988	-11.6873		ALD6	0.000161587	0.0105652	12.9601
RRT15	0.00232408	0.0265855	-11.406		HXT2	4.14735e-08	0.000124773	12.3945
YBR012W-B	2.33065e-06	0.00233725	-11.3566		SIT1	3.68915e-07	0.00073992	8.46808
YRO2	3.54739e-06	0.00245945	-11.2025		OLI1	0.0025942	0.0279196	7.57159
TIR1	3.52311e-05	0.00727939	-10.489		TIS11	8.23833e-05	0.00971962	6.20478
PIR3	0.00168163	0.0233406	-10.0978		YML090W	0.00012334	0.00985988	5.40194
DAN1	0.000572623	0.0157494	-9.28255		COX1	0.000562448	0.015725	5.30653
ANB1	4.49626e-06	0.00245945	-8.51727		FET3	4.29641e-06	0.00245945	5.09364
PAU24	0.00022497	0.0120925	-8.20002		ETS1-2	0.00151107	0.0226736	4.88857
SPR28	0.000350795	0.0133676	-7.71967		ETS1-1	0.00151107	0.0226736	4.88857
THI12	8.88136e-05	0.00985988	-7.60185		YHR033W	0.000109473	0.00985988	4.50527
RDN18-2	0.004302	0.0338826	-7.29403		YOL150C	0.00103616	0.0194504	4.39181
RDN18-1	0.00430192	0.0338826	-7.29398		YGR035C	0.00270163	0.0283695	4.35159
SER3	9.45477e-05	0.00985988	-7.09409		SAM1	0.000721209	0.0171522	3.98786
BIO4	0.000339106	0.0133676	-6.66995		SRG1	0.000380054	0.0134941	3.74919
YGR161C-D	1.20911e-06	0.00145504	-6.57786		LSR1	0.000986278	0.0189568	3.31909
YBR012C	7.19251e-06	0.00332903	-6.52617		YMR316C-A	0.00324629	0.0306919	3.31581
DAL80	0.000172054	0.0105652	-6.47488		FIT3	0.000153391	0.0105652	3.04815
YOR050C	0.000161599	0.0105652	-6.38626		YML009W-B	7.73906e-05	0.00971962	3.03738
IRC18	0.00176585	0.0235995	-6.34306		MMF1	8.09655e-05	0.00971962	2.96804
YLR035C-A	9.69844e-05	0.00985988	-6.2572		GPX2	0.00436768	0.0340428	2.94452
MF(ALPHA)2	0.000422834	0.014214	-6.21934		ENB1	0.000139526	0.0103646	2.86888
PES4	2.12706e-05	0.006446	-6.10676		21S_RRNA	0.00203382	0.0252383	2.8332
HUG1	0.000830071	0.0179968	-6.00404		HXT7	0.00326614	0.0306919	2.78391
SPS22	4.39775e-05	0.00756036	-5.99425		YFR036W-A	4.03504e-05	0.00735722	2.77149
PRM1	0.000645755	0.0163151	-5.98603		YBR016W	0.00810391	0.0474331	2.71095
YMR320W	2.62313e-05	0.0069976	-5.96485		HIS4	2.79113e-05	0.0069976	2.67318
SPS1	4.19484e-05	0.00742364	-5.8822		FTR1	0.000445173	0.0146829	2.65841
YAR029W	0.000138788	0.0103646	-5.61748		CTR1	0.00335468	0.0309113	2.63511
AMA1	0.000955812	0.0189182	-5.60464		HAP4	0.00128141	0.0210988	2.62809
SIP4	0.000102533	0.00985988	-5.5811		TPO1	0.000397549	0.0135912	2.62341
YIL141W	0.000314172	0.0130229	-5.55405		YJL067W	0.00206452	0.0253515	2.5782
YCL019W	0.000395425	0.0135912	-5.51441		GAC1	0.00317343	0.0304926	2.45296
YDL071C	0.000711076	0.0171202	-5.51123		REE1	0.0025331	0.0276099	2.43811
SMA1	0.000760886	0.017712	-5.26601		QCR6	0.00153609	0.0227819	2.42709
EFM6	9.0405e-05	0.00985988	-5.24709		RPS22B	0.00084944	0.0179968	2.38889
THI5	0.00110647	0.0201747	-4.93425		YNL134C	0.00717667	0.0446556	2.37381
YGR176W	0.00269162	0.0283695	-4.83266		XBP1	0.00234361	0.0267073	2.36294
SPR3	0.000489626	0.0148623	-4.81284		MUP1	0.00264196	0.0281257	2.33148
YGR161W-B	7.74973e-05	0.00971962	-4.78433		PHD1	0.00108305	0.0199029	2.33021
YPR078C	0.00119622	0.0208025	-4.77986		YLR294C	0.00117594	0.0206891	2.29216
YNL018C	0.000136549	0.0103646	-4.7285		RSB1	0.00129356	0.0211981	2.29141
YPR014C	0.00108416	0.0199029	-4.71717		SPS100	0.00883077	0.0492447	2.28037
YBL111C	0.00114419	0.0203086	-4.62529		LCL1	0.00273075	0.0284222	2.24444
YOR343C	0.00229476	0.0264257	-4.60164		GRE2	0.00784953	0.0467062	2.19075
YAR030C	0.000363742	0.0134453	-4.5598		PDR5	0.000311254	0.0130229	2.17459
TPO2	2.39701e-05	0.00686801	-4.48116		YKL083W	0.00889958	0.0493537	2.16211
FUS2	0.000238809	0.012515	-4.47789		FPR3	0.004077	0.0331057	2.12693
GCV2	0.000331698	0.0132633	-4.46895		FIT2	0.000691276	0.0167718	2.12493
MAN2	0.000175312	0.0105652	-4.45903		YMR075C-A	0.00843757	0.0484559	2.08498
YRF1-3	0.000591276	0.015953	-4.43974		NDE1	0.000669011	0.0164304	2.06169
YMR244W	0.00541991	0.038664	-4.42624		COX8	0.00320341	0.0304926	2.05649
IZH4	0.000176008	0.0105652	-4.41792		YDR271C	0.00567329	0.0394638	2.04815
PDR12	6.80699e-07	0.00102394	-4.39856		PET9	3.87988e-05	0.00729538	2.03472
YJR154W	9.64875e-05	0.00985988	-4.39019		FUN12	0.000820762	0.0179708	2.02582
CAR1	0.00117054	0.0206544	-4.37622		RFS1	0.000371225	0.0134941	2.01043
YFL002W-A	0.000133276	0.0102811	-4.35536		ATP1	0.00021623	0.0120468	1.96055
YBR184W	0.00851591	0.0486612	-4.29409		CGR1	0.00874213	0.0491143	1.94265
DSF1	0.000858907	0.0180071	-4.25311		CSR2	0.00571249	0.0396448	1.92345
YDL242W	0.000763048	0.017712	-4.20787		RCF3	0.00428867	0.0338826	1.90741
NAT4	0.000989727	0.0189568	-4.1902		YDR154C	0.00210298	0.0256551	1.86657
YDR274C	0.00190914	0.0249011	-4.18847		MDG1	0.00591296	0.0402371	1.85687
IMD2	5.85277e-06	0.00293468	-4.14171		COX4	0.00401413	0.0327864	1.84586
RDN37-1	0.00262051	0.0279567	-4.13932		CHZ1	0.00213784	0.0258046	1.83977
NQM1	0.000317512	0.0130229	-4.07878		ADR1	0.000118489	0.00985988	1.83608
RDN37-2	0.0014619	0.0224968	-4.06629		YIL020C-A	0.00496507	0.0368355	1.82165
YPR158W-B	0.000171956	0.0105652	-4.06444		YGR053C	0.00829481	0.0479903	1.81272
YLR326W	1.88715e-05	0.00630831	-4.06347		ATP11	0.00328315	0.0307705	1.80908
ECM11	0.00846629	0.0485159	-3.95604		SMB1	0.000714171	0.0171202	1.79993
ERR3	0.00903138	0.0497636	-3.92755		QCR7	0.00297663	0.0296039	1.78798
YBL100W-B	0.000287685	0.0128466	-3.9222		RQC2	0.00346173	0.0309646	1.77714
HXT4	0.000954788	0.0189182	-3.9116		ATP20	0.00885113	0.0492666	1.77456
YER187W	0.00129647	0.0211981	-3.9101		CYT1	0.00745537	0.0454675	1.75069
REC8	3.61978e-05	0.00727939	-3.88421		IMG2	0.00620047	0.0411337	1.74196
SAG1	0.00049125	0.0148623	-3.86516		RPL36B	0.00857908	0.0487811	1.74154
THI13	0.000665548	0.0164123	-3.80663		ATP3	0.000489718	0.0148623	1.74096
TIR4	7.40125e-05	0.00971962	-3.79976		CPR2	0.00153452	0.0227819	1.738
YGR039W	0.00130721	0.021258	-3.79479		COR1	0.00154804	0.0228298	1.73567
HXT9	0.000619031	0.0160548	-3.72966		MEF2	0.00123286	0.0210252	1.72042
MAM1	0.000842354	0.0179968	-3.72011		ATP4	0.00552397	0.0390114	1.71763
YRF1-7	0.00100555	0.0190864	-3.69167		SOD1	0.00783026	0.0466944	1.71326
YPR203W	0.00579584	0.0399926	-3.68713		YOR200W	0.00536041	0.0383059	1.67294
YCR001W	0.00422166	0.0338689	-3.68119		MRPS16	0.00623603	0.0412332	1.67231
YIL177C	0.000522991	0.0153553	-3.67952		ODC1	0.0002427	0.012515	1.66917
RNR3	0.000124625	0.00985988	-3.66904		AIM23	0.00295686	0.0295048	1.66425
RDS1	0.000730662	0.0173086	-3.64375		COX5A	0.00521205	0.037558	1.6621
YMR122C	0.00277887	0.0284304	-3.6426		FTH1	0.00210631	0.0256551	1.66199
YDR034C-D	0.00052726	0.0154006	-3.64208		MAP2	0.00280284	0.0285752	1.65625
SYG1	0.00069025	0.0167718	-3.62851		IMH1	0.0016903	0.0233406	1.64595
PDC6	0.000508007	0.0151321	-3.61415		YGL152C	0.00464165	0.0352192	1.64122
GTT3	0.00347227	0.0309646	-3.60103		YOR169C	0.00813306	0.0475257	1.64006
YDR042C	0.000891691	0.0182961	-3.59102		MRPL17	0.0058188	0.0400516	1.63899
RNP1	0.00269646	0.0283695	-3.5755		RPM2	0.000501221	0.0150042	1.63606
YMR254C	0.000225089	0.0120925	-3.55193		QRI5	0.00452915	0.0347601	1.63139
BIO3	0.000377402	0.0134941	-3.55128		SDH7	0.00370206	0.0315514	1.62699
AGA1	0.00802361	0.0471459	-3.537		ENA1	0.00516165	0.0373776	1.62604
YEH1	0.00136981	0.0216899	-3.51668		MHR1	0.00429298	0.0338826	1.62219
GPI19	0.000889983	0.0182961	-3.51237		ATP2	0.0015391	0.0227819	1.61768
YER188W	0.00036454	0.0134453	-3.50546		MRPS18	0.00303211	0.0297088	1.60439
THI4	0.00268934	0.0283695	-3.47651		MIR1	0.000906533	0.0183657	1.59943
YGR269W	0.00305657	0.0297184	-3.46467		YPL199C	0.00371346	0.0316038	1.57915
DCG1	0.00026558	0.0127317	-3.42848		BUG1	0.00219529	0.0261685	1.57448
DIT2	0.00223408	0.0262243	-3.41545		ITR1	0.00112342	0.0201779	1.57077
MIP6	0.000713373	0.0171202	-3.37262		ATP7	0.00356402	0.0310608	1.56332
COS12	0.0020263	0.0252383	-3.37089		CYC3	0.00614691	0.0409137	1.56303
HES1	0.00183278	0.0240815	-3.36777		ICS2	0.00795029	0.0469503	1.55235
INA1	0.00365162	0.0313435	-3.32418		CMK1	0.00874117	0.0491143	1.53795
SPC24	0.000377945	0.0134941	-3.31857		IMG1	0.00640166	0.0418683	1.52841
YLL059C	0.00192631	0.0249797	-3.28558		ATP5	0.0016095	0.0231048	1.51794
PLM2	0.00460536	0.0351337	-3.27178		YFR016C	0.00582436	0.0400516	1.51432
YCL001W-A	0.00382326	0.0321993	-3.2615		MRP13	0.00346964	0.0309646	1.5089
YPR064W	0.0022154	0.0262243	-3.25752
CBF2	0.00543498	0.038664	-3.25033
GAS2	0.00256046	0.0276099	-3.24387
FUR4	0.00341437	0.0309646	-3.24197
TIR2	0.00108495	0.0199029	-3.24054
PAU5	0.00857835	0.0487811	-3.22782
BNA4	0.00104089	0.0194504	-3.20663
PIR5	0.00127234	0.0210988	-3.18976
GIT1	0.000825199	0.0179899	-3.18874
DAL4	0.000194142	0.0112323	-3.18059
YAR061W	0.00734133	0.0450283	-3.1297
YIR035C	3.97202e-06	0.00245945	-3.12776
YFL067W	0.00261874	0.0279567	-3.06483
TOS6	7.76948e-05	0.00971962	-3.02343
TDH2	1.77501e-05	0.00628248	-3.01428
ATF2	0.000634913	0.0161876	-3.01404
THI11	0.000919472	0.0185653	-3.00592
CLB6	0.00193548	0.0250083	-3.00403
HXT12	0.000230639	0.012281	-2.99962
MEI4	0.000113818	0.00985988	-2.99439
RPL18B	0.00447268	0.0345028	-2.9774
GCV1	0.00201492	0.0252383	-2.97449
DCV1	0.000558281	0.015725	-2.96486
YBL005W-B	2.73825e-05	0.0069976	-2.95645
DAL1	0.000174095	0.0105652	-2.94964
YHL049C	0.00357223	0.0310608	-2.94455
SPO74	0.00628633	0.0414746	-2.93848
PET18	0.000458993	0.0147999	-2.92707
SEO1	0.000297509	0.0128785	-2.92277
DOC1	0.000366468	0.0134453	-2.92177
YCH1	5.17209e-05	0.00841093	-2.92119
YDR261W-B	0.0027415	0.0284222	-2.91879
PMA1	0.0079512	0.0469503	-2.90377
TPO3	3.42226e-05	0.00727939	-2.89881
YIL082W-A	0.000570969	0.0157494	-2.88676
AAD3	0.000117921	0.00985988	-2.88238
SPO20	0.00565467	0.0394207	-2.87769
YFL066C	0.00352789	0.0310575	-2.86874
PRM2	0.000873107	0.0182211	-2.86711
YGR293C	0.00653454	0.0422778	-2.86105
NDJ1	0.00054522	0.0157094	-2.85915
AST1	2.1426e-05	0.006446	-2.84508
YJL225C	1.45648e-05	0.00547726	-2.84039
VEL1	0.00428421	0.0338826	-2.8393
FDH1	0.00353035	0.0310575	-2.83406
YBR238C	0.00287529	0.0290387	-2.82199
YNL284C-B	0.00305032	0.0297184	-2.81572
SPC98	0.00593123	0.0402371	-2.81226
YIM2	0.00879515	0.0492447	-2.80535
YGR051C	0.00308384	0.02988	-2.80261
ENO1	7.92736e-05	0.00971962	-2.79957
AAC3	0.000200648	0.0114026	-2.79675
DDI2	0.00142356	0.0220194	-2.79144
FRM2	0.00401733	0.0327864	-2.7827
YLR122C	0.0039978	0.0327369	-2.78134
YIL058W	0.00395246	0.0326904	-2.77248
ADY2	0.000844278	0.0179968	-2.76584
YOR114W	0.000469148	0.0147999	-2.75291
GAP1	0.00595006	0.0402371	-2.74383
GLN1	6.50124e-05	0.00954097	-2.74027
RDN25-1	0.00111624	0.0201779	-2.73633
YPR195C	0.00774098	0.0463457	-2.72748
GIC1	0.000806615	0.0179708	-2.72631
PRR2	0.00330134	0.0308522	-2.69497
PAU12	0.00666295	0.0429239	-2.68692
DBF2	0.0073205	0.0450047	-2.68381
FAA4	0.000294636	0.0128466	-2.68046
YGR126W	0.000390403	0.0135783	-2.67223
DIT1	0.00119438	0.0208025	-2.67103
IMA1	0.000654456	0.0163198	-2.65812
MCH2	0.00221836	0.0262243	-2.65802
REC102	0.000992421	0.0189568	-2.65723
ATO3	0.00011233	0.00985988	-2.65327
RDN25-2	0.000550147	0.0157094	-2.65265
SWI1	0.00238231	0.0269394	-2.65034
YEL008W	0.00298226	0.029611	-2.64684
SLI15	0.000147323	0.0105652	-2.64119
MUM3	0.000557831	0.015725	-2.63517
YGR038C-B	0.001541	0.0227819	-2.62546
GAL7	0.00399893	0.0327369	-2.6241
YCL049C	0.000353126	0.0133676	-2.61046
BFA1	0.000538099	0.0156413	-2.61011
YAR028W	1.42988e-05	0.00547726	-2.60695
FIG2	0.00190284	0.0248899	-2.6062
SFC1	0.004283	0.0338826	-2.60609
PAC11	5.75197e-05	0.00903502	-2.60496
YJL225W-A	0.00204802	0.0252461	-2.60428
YIL177W-A	0.00204802	0.0252461	-2.60428
CAR2	0.000627483	0.0160662	-2.6
YGL204C	0.00246254	0.0273055	-2.58939
FDO1	0.00908092	0.0499203	-2.57543
ADH5	3.76433e-05	0.00729538	-2.57299
ELA1	0.000549152	0.0157094	-2.56416
YGP1	0.000845961	0.0179968	-2.56272
SPO21	0.00126381	0.0210988	-2.5626
YFL040W	0.0025435	0.0276099	-2.56085
DLD3	0.000106663	0.00985988	-2.5458
PAU4	0.0087276	0.0491143	-2.54431
YHP1	0.00598672	0.0402371	-2.5417
FRE4	0.000577813	0.0157925	-2.53054
ADH7	0.00196631	0.0250133	-2.52404
RCK1	0.00332428	0.0309113	-2.51987
FCY22	0.000177345	0.0105652	-2.51194
GAS4	0.0006233	0.0160662	-2.50215
UGA4	0.00330724	0.0308522	-2.49392
RMA1	0.000454132	0.0147999	-2.48388
NVJ3	0.00160373	0.0231048	-2.48052
YEL047C	0.00121543	0.0210252	-2.48011
YIL047C-A	0.000316202	0.0130229	-2.47907
ARR3	0.000343435	0.0133676	-2.47862
YGL230C	0.00657185	0.0424279	-2.47503
YDL211C	0.0042156	0.0338655	-2.47129
KAP122	0.00476734	0.0358116	-2.46679
SMK1	0.000291532	0.0128466	-2.46312
SPO77	0.00243927	0.0271968	-2.45913
FKH2	0.000163543	0.0105652	-2.45822
CMR1	0.000270851	0.0127317	-2.45646
CTF13	0.000381253	0.0134941	-2.45459
SCM4	1.36187e-05	0.00547726	-2.45025
FCY21	7.5225e-05	0.00971962	-2.4457
HUA2	0.000287358	0.0128466	-2.43778
FMT1	0.0015604	0.0228608	-2.43591
SET4	0.000746708	0.0175506	-2.42953
SPO11	0.00133177	0.0214509	-2.42823
SRT1	0.000580048	0.0157925	-2.42662
MRX11	0.000220661	0.0120701	-2.42391
YNL095C	0.000564502	0.015725	-2.41772
SPO13	0.00276087	0.0284222	-2.4148
CTA1	0.00170051	0.0233406	-2.41399
NCA3	0.00269905	0.0283695	-2.40827
POL12	0.00280671	0.0285752	-2.40646
HXT11	0.000963813	0.0189568	-2.40552
YBR201C-A	0.00232351	0.0265855	-2.40392
YGL039W	0.000270126	0.0127317	-2.40214
CPA2	0.000838142	0.0179968	-2.39717
PMA2	0.00203687	0.0252383	-2.39363
DDI3	0.00164081	0.02323	-2.39286
DUR1,2	0.00217251	0.0260357	-2.38393
CRF1	0.000365939	0.0134453	-2.38269
SPH1	0.00134816	0.0215169	-2.37923
TCA17	0.00181586	0.0240132	-2.37325
YPR196W	0.000331553	0.0132633	-2.3732
SUR2	0.00357122	0.0310608	-2.37067
SPC25	0.000353214	0.0133676	-2.36544
YJL132W	0.000898531	0.018327	-2.3644
YNL033W	0.00658859	0.0424904	-2.36043
GIP1	0.000593897	0.015953	-2.36006
YGL117W	7.24267e-05	0.00971962	-2.35876
SWE1	0.00103893	0.0194504	-2.34723
YHR054C	0.000516172	0.0152995	-2.34569
YDR210W-B	0.00163802	0.02323	-2.34445
COS10	0.00535248	0.0382948	-2.33455
CSI2	0.000320324	0.0130229	-2.33344
LEU1	6.28972e-05	0.00946131	-2.32643
RAD55	0.00261916	0.0279567	-2.31574
MPS3	0.000469799	0.0147999	-2.31038
ROG3	0.00134667	0.0215169	-2.30532
AXL2	0.000847581	0.0179968	-2.3005
YML037C	0.00122501	0.0210252	-2.29905
ACO2	0.000975852	0.0189568	-2.29794
ADH2	0.00111507	0.0201779	-2.29291
BSC5	0.00353037	0.0310575	-2.28965
MAL12	0.00685642	0.0435636	-2.28819
SPO23	0.000982467	0.0189568	-2.28789
TIR3	0.00265037	0.0281257	-2.28729
YML083C	0.00393375	0.0326904	-2.28523
PCH2	0.00690965	0.0438097	-2.28332
YNR066C	0.00353055	0.0310575	-2.28012
SEC59	0.00220293	0.0261957	-2.27944
YMR045C	0.000154529	0.0105652	-2.27906
LAC1	0.000120724	0.00985988	-2.27761
JLP2	0.000172335	0.0105652	-2.26839
DTR1	0.00558716	0.0392999	-2.26004
RIM4	0.00522896	0.0376348	-2.25149
EXO70	0.000818635	0.0179708	-2.25036
CIK1	0.000473481	0.0148382	-2.24962
BUB1	0.00381534	0.0321976	-2.24947
PDE1	0.000468768	0.0147999	-2.24799
THI72	0.00161974	0.0231048	-2.24685
MRH1	0.000254226	0.012642	-2.2385
YNL203C	0.00900151	0.04969	-2.23722
YOR192C-B	0.00140999	0.0219223	-2.23312
MOH1	0.00335172	0.0309113	-2.23106
THI7	3.60878e-05	0.00727939	-2.22707
GLT1	0.00175048	0.0235476	-2.2263
IMA5	0.00194594	0.0250083	-2.22527
BSC2	0.000422853	0.014214	-2.22316
FDH2	0.00338061	0.0309136	-2.22205
IZH3	0.00033285	0.0132633	-2.21852
URH1	5.15254e-05	0.00841093	-2.21695
TKL2	0.00601341	0.0402371	-2.21602
SPS2	0.000604339	0.0160548	-2.21163
NDD1	0.000804569	0.0179708	-2.21122
NTE1	0.000126178	0.00985988	-2.20973
SDD1	0.00430638	0.0338826	-2.20836
MCD1	0.00275591	0.0284222	-2.20648
SHH3	0.000490883	0.0148623	-2.20245
RED1	0.00149828	0.0226736	-2.19989
VIK1	0.00426673	0.0338826	-2.19735
PFK2	3.11377e-05	0.00727939	-2.1943
VTH2	0.000107439	0.00985988	-2.19325
SAS2	0.00169007	0.0233406	-2.19152
SNO1	0.00111771	0.0201779	-2.18952
PEX9	0.00651107	0.0422778	-2.18592
YGR109W-B	0.00161123	0.0231048	-2.18301
ATG15	0.000274658	0.0127317	-2.18263
YIR042C	0.000294626	0.0128466	-2.18076
TTI1	0.0033746	0.0309136	-2.17408
PRM9	0.000101025	0.00985988	-2.17253
IPL1	0.00634823	0.0416471	-2.17022
AMD2	0.000185299	0.0108247	-2.16867
SFK1	0.000491322	0.0148623	-2.16575
YML057C-A	0.00582324	0.0400516	-2.16524
EXG2	0.000883549	0.0182691	-2.16357
DIF1	0.00155509	0.0228608	-2.15966
SSU72	0.000393762	0.0135912	-2.15507
BIO5	0.00119125	0.0208025	-2.154
PDR17	3.62941e-05	0.00727939	-2.1484
PHO12	0.000618587	0.0160548	-2.14509
MAL32	0.00448442	0.034549	-2.14477
VTH1	0.00162206	0.0231048	-2.14442
AAD4	0.00150577	0.0226736	-2.14309
URA2	0.00354727	0.0310608	-2.13203
MGA2	0.000200877	0.0114026	-2.13174
SLO1	0.00313392	0.0302677	-2.12828
GCR1	0.000218961	0.0120701	-2.12568
YDR222W	0.00692927	0.0438324	-2.12433
YEF1	0.00125571	0.0210603	-2.11789
YDL109C	0.00167828	0.0233406	-2.11561
THI73	0.000812969	0.0179708	-2.11446
DIN7	0.00833281	0.0480882	-2.1133
YAL037W	0.000345522	0.0133676	-2.11158
YMR147W	0.00760515	0.0459583	-2.11012
ADH4	0.000113761	0.00985988	-2.10645
ATG22	0.000456812	0.0147999	-2.10625
STB5	0.00246417	0.0273055	-2.10403
HOP1	0.00617933	0.0410674	-2.09997
SWF1	0.00028022	0.0127734	-2.09958
ICS3	0.00578907	0.0399918	-2.09824
VBA2	0.000161811	0.0105652	-2.09635
KIN4	0.00672539	0.0430496	-2.09601
YCR102C	0.00227893	0.0264257	-2.09544
MTD1	0.00124747	0.0210252	-2.09523
CLB2	0.00381444	0.0321976	-2.08927
CTF19	0.000742143	0.0175117	-2.08792
PTH1	0.00713565	0.0445386	-2.08755
RRN3	0.00302298	0.0297088	-2.08738
YSW1	0.0042589	0.0338826	-2.08633
RTT109	0.00219629	0.0261685	-2.08454
ARE1	5.85617e-05	0.00903502	-2.08442
YMR252C	0.000120825	0.00985988	-2.08189
PHM8	0.00230253	0.0264396	-2.08061
DOG1	0.000811414	0.0179708	-2.07907
NKP2	0.0051113	0.0372333	-2.07552
POP3	0.00106266	0.0197346	-2.07289
KAR5	0.00127861	0.0210988	-2.07003
ZIP2	0.00195465	0.0250083	-2.06789
THI2	0.00343023	0.0309646	-2.06495
CPA1	0.0034847	0.0309646	-2.06456
IRC23	0.000239715	0.012515	-2.05867
ASK1	9.4124e-05	0.00985988	-2.05734
POL30	0.00295275	0.0295048	-2.05613
RRT12	0.00385231	0.0322832	-2.05418
YOR389W	0.0011348	0.0202615	-2.05216
MGS1	0.00632358	0.0415609	-2.05163
FBP1	0.00908364	0.0499203	-2.04998
DUN1	0.0016022	0.0231048	-2.04857
SHU1	0.000387755	0.0135647	-2.04816
WHI5	0.00128047	0.0210988	-2.04806
CTP1	0.00113145	0.0202615	-2.04775
PPT2	0.0035886	0.0310794	-2.04737
CLB4	0.000903802	0.0183657	-2.04609
SST2	0.00195761	0.0250083	-2.04355
PUT1	0.00395523	0.0326904	-2.03427
AMF1	0.00229679	0.0264257	-2.03263
SPT10	0.000305973	0.0130229	-2.02758
CYB5	0.00516839	0.0373776	-2.02707
OPT2	0.00652013	0.0422778	-2.02546
CTF18	0.00504267	0.0370524	-2.02498
AFI1	0.00671536	0.0430348	-2.02052
YKL091C	0.000248878	0.012515	-2.02032
UBC11	0.00799114	0.0470441	-2.02027
ARG1	0.000977984	0.0189568	-2.01565
PGI1	0.000275958	0.0127317	-2.01545
PGK1	0.00114172	0.0203086	-2.01509
RDR1	0.00200564	0.0252383	-2.01253
AUS1	0.00157142	0.022894	-2.01237
MSH4	0.000762848	0.017712	-2.01143
AGP1	0.00901108	0.0496972	-2.00838
THI22	0.00143995	0.0222159	-2.00797
ERG3	0.00368402	0.0314422	-2.00697
CTR86	0.00125655	0.0210603	-2.00385
KES1	0.000150191	0.0105652	-2.00342
SIM1	9.65025e-05	0.00985988	-2.00248
HSL7	0.00066433	0.0164123	-1.99513
STL1	0.00501114	0.0370182	-1.99419
MPC54	0.000781629	0.0178824	-1.99418
CSM3	0.00361046	0.031168	-1.99321
BAR1	0.00173361	0.0235466	-1.98968
YOR343W-B	6.68393e-05	0.00957552	-1.9866
YMR253C	0.000118266	0.00985988	-1.98436
CDC19	0.00731506	0.0450047	-1.98223
SGO1	0.00694946	0.043855	-1.98166
EXO1	0.00175325	0.0235476	-1.97732
SHU2	0.00558013	0.0392999	-1.9772
YJL118W	0.00374042	0.0317883	-1.9761
SRC1	0.0014865	0.0226503	-1.97576
CTR3	0.00542668	0.038664	-1.97534
SSK22	0.00170413	0.0233406	-1.97067
IML3	0.000779362	0.0178824	-1.96695
HOS3	0.00133333	0.0214509	-1.96216
ALK1	0.00528592	0.0379539	-1.95286
CTL1	0.00344106	0.0309646	-1.95098
HLR1	0.00359065	0.0310794	-1.94988
TPI1	0.0035249	0.0310575	-1.94869
GAL1	0.00585256	0.0401996	-1.94715
HCM1	0.0030647	0.0297424	-1.94515
KRE29	0.002765	0.0284222	-1.94362
DMA2	0.000950066	0.0189182	-1.94354
SWM2	0.00398284	0.0327369	-1.94263
HOT13	0.00740161	0.0452597	-1.94252
YAL016C-A	0.00799835	0.0470441	-1.94249
LOH1	0.00236518	0.0268009	-1.93936
BST1	0.000384141	0.0135168	-1.93683
YEL067C	0.00741366	0.0452873	-1.93551
IRC10	0.00510139	0.0372061	-1.93409
COS7	0.00226884	0.0264054	-1.9318
RAD53	0.00504337	0.0370524	-1.93172
FLR1	0.00440675	0.034135	-1.93027
PAC2	0.00223615	0.0262243	-1.92637
STP4	0.00030364	0.0130229	-1.92479
LDB17	0.00160843	0.0231048	-1.92287
PMS1	0.00861797	0.0487811	-1.92214
MAY24	0.00639637	0.0418683	-1.9212
MPA43	0.000523157	0.0153553	-1.92104
SNZ1	0.00292646	0.0293873	-1.92054
PET10	0.000875292	0.0182211	-1.91895
FHL1	0.0078977	0.0468182	-1.91784
ATG41	0.00566054	0.0394207	-1.91517
YPK2	0.00183039	0.0240815	-1.91492
INP2	0.00433478	0.0339627	-1.91463
POC4	0.00562561	0.0392999	-1.91334
ECM22	0.00286325	0.0290387	-1.91102
YHL026C	0.000180066	0.0106221	-1.91029
IRR1	0.00668772	0.0429915	-1.90986
THI74	0.00180798	0.0239617	-1.90962
INM1	0.00176889	0.0235995	-1.90949
FLO1	0.00787961	0.0468032	-1.90938
DED1	0.00255598	0.0276099	-1.90382
DAL7	0.00345042	0.0309646	-1.90222
TDA4	0.00593057	0.0402371	-1.90206
YLR379W	0.000979387	0.0189568	-1.90095
GTO1	0.00695324	0.043855	-1.89563
PUS2	0.0035703	0.0310608	-1.89268
NSE1	0.00337268	0.0309136	-1.89254
EGH1	0.00016356	0.0105652	-1.89141
ALT2	0.00463541	0.0352162	-1.88977
CSS2	0.00820574	0.0476866	-1.88906
ENV9	0.00043786	0.0146367	-1.88851
ECM25	0.00277278	0.0284222	-1.87998
LST8	0.000584103	0.0158313	-1.87954
SPC29	0.00362489	0.0312031	-1.87917
CUL3	0.00156154	0.0228608	-1.87749
ADA2	0.000357712	0.0134453	-1.8771
YKL023C-A	0.00775009	0.0463541	-1.87675
SPG5	0.000446563	0.0146829	-1.87589
HEM13	0.00217649	0.0260357	-1.87354
BUB3	0.00505146	0.0370666	-1.87225
TEL2	0.00737876	0.0451658	-1.87193
PCS60	0.00241386	0.0271259	-1.86972
GPD2	0.000101651	0.00985988	-1.86953
MUD1	0.000648049	0.0163151	-1.86883
CAN1	0.000654952	0.0163198	-1.86768
IME2	0.00607478	0.0404784	-1.86669
YOX1	0.00574973	0.0398115	-1.86658
PMT5	0.00473587	0.0356197	-1.86389
TEN1	0.00469051	0.0354558	-1.86375
MET30	0.00084034	0.0179968	-1.86188
PDH1	0.00483055	0.036116	-1.86137
STN1	0.00024833	0.012515	-1.86122
UGA1	0.00645882	0.0421468	-1.86025
PPR1	0.00882027	0.0492447	-1.86005
AXL1	0.000121749	0.00985988	-1.85896
CUE2	0.00397731	0.0327369	-1.85545
FRE5	0.00341096	0.0309646	-1.85356
PHO11	0.00402133	0.0327864	-1.85338
SIR1	0.0022624	0.0263815	-1.85254
ACA1	0.000491541	0.0148623	-1.85234
YGR117C	0.00124678	0.0210252	-1.85147
STP3	0.000249594	0.012515	-1.85075
ATR1	0.00153091	0.0227819	-1.84996
VAM7	0.00304148	0.0297088	-1.84904
BDS1	0.0022402	0.0262243	-1.84319
VPS36	0.00134744	0.0215169	-1.84032
ASN1	0.00334803	0.0309113	-1.83948
THI21	0.00326965	0.0306919	-1.83853
AGE1	0.00138624	0.0217768	-1.83503
AVT1	0.000444552	0.0146829	-1.83469
YPR015C	0.00470754	0.0355351	-1.83383
YJR115W	0.00724428	0.0448445	-1.83235
RAD54	0.00251784	0.0276099	-1.82994
YPR174C	0.00893676	0.0494687	-1.82822
ISC1	0.00055991	0.015725	-1.82789
RAD51	0.000795983	0.0179708	-1.82698
YNL011C	0.00723813	0.0448445	-1.82551
PFK1	0.000211397	0.0118876	-1.82435
YGL081W	0.00364927	0.0313435	-1.82403
MUS81	0.00205175	0.0252461	-1.8219
THI20	0.000379839	0.0134941	-1.82152
SAE2	0.00277101	0.0284222	-1.82129
DAL3	0.00586418	0.0402028	-1.82066
TOS3	0.00430782	0.0338826	-1.81669
BCH2	0.000319542	0.0130229	-1.81611
YIR019C	0.00326569	0.0306919	-1.81585
KIP2	0.00167134	0.0233406	-1.81499
PSK2	0.00261351	0.0279567	-1.81423
YLR225C	0.00731017	0.0450047	-1.81406
AYT1	0.00299817	0.0296224	-1.81351
MATALPHA1	0.00349426	0.0309646	-1.81341
MLH3	0.000626476	0.0160662	-1.80948
YMR087W	0.00461952	0.0351399	-1.80761
VHC1	0.00138166	0.0217768	-1.80625
ILV5	0.00544634	0.0386903	-1.80437
VID22	0.000169522	0.0105652	-1.80399
YHR177W	0.00300541	0.0296452	-1.80378
YCR061W	0.00320729	0.0304926	-1.8007
SGF29	0.00057323	0.0157494	-1.80049
GIC2	0.00149885	0.0226736	-1.80013
STB6	0.0050962	0.0372061	-1.7986
UIP5	0.000468247	0.0147999	-1.79814
PRM10	0.00384708	0.0322832	-1.79486
YKR005C	0.00548247	0.0388094	-1.79365
PLB3	0.00027361	0.0127317	-1.79227
AAP1	0.000821335	0.0179708	-1.78892
SPR1	0.00416287	0.0336666	-1.78653
RGT2	0.00203457	0.0252383	-1.7862
YDR444W	0.00621663	0.0411954	-1.78562
ARG7	0.0024164	0.0271259	-1.78441
ATF1	0.00745827	0.0454675	-1.78437
YNL054W-B	0.00169872	0.0233406	-1.78359
TGL5	0.000146315	0.0105652	-1.78228
EST1	0.00229693	0.0264257	-1.78207
JHD2	0.00207805	0.0254236	-1.78117
CLN2	0.00421252	0.0338655	-1.78013
SFP1	0.000923591	0.0185861	-1.77829
FLO10	0.00868605	0.0490281	-1.77735
HPR1	0.000353239	0.0133676	-1.77689
CRG1	0.00428811	0.0338826	-1.77684
SIP1	0.00421095	0.0338655	-1.77085
YSP3	0.005168	0.0373776	-1.76993
KCH1	0.0008782	0.0182211	-1.76854
NDT80	0.00424556	0.0338826	-1.76828
MMS4	0.00174543	0.0235476	-1.76823
RBH1	0.00684116	0.043513	-1.76697
HXK2	0.000934995	0.0187529	-1.76543
ANY1	0.000159965	0.0105652	-1.76506
SLM3	0.00128339	0.0210988	-1.76432
SLT2	0.0024408	0.0271968	-1.76329
HFM1	0.00176119	0.0235995	-1.76304
SWD1	0.00366333	0.0313546	-1.75747
PSF1	0.00174618	0.0235476	-1.75383
TOS2	0.00563013	0.0392999	-1.75344
ECM5	0.00183303	0.0240815	-1.75235
FKS3	0.00413858	0.0335152	-1.75077
MPH3	0.00595866	0.0402371	-1.74986
SRD1	0.00378992	0.032073	-1.74935
CCZ1	0.00760392	0.0459583	-1.74763
KNH1	0.00735328	0.0450557	-1.74538
MMT1	0.00303869	0.0297088	-1.7434
BRR6	0.00247876	0.0274168	-1.74278
YJR098C	0.0083517	0.0480882	-1.74077
DSD1	0.000819734	0.0179708	-1.7399
CIP1	0.00842633	0.0484559	-1.7362
YDR262W	0.00888092	0.0493412	-1.73548
TKL1	0.000615802	0.0160548	-1.7349
YPL162C	0.00107588	0.0199029	-1.73308
SUL1	0.00519115	0.0374522	-1.73263
OYE2	0.000608382	0.0160548	-1.73138
YPR003C	0.00386962	0.0322933	-1.7312
PMT6	0.00274387	0.0284222	-1.73116
RTT105	0.00214582	0.0258228	-1.73046
YNL190W	0.000260435	0.0127317	-1.72829
GDH2	0.00109627	0.0200495	-1.72777
ARG80	0.0025292	0.0276099	-1.72531
TRM44	0.00590507	0.0402371	-1.7226
RUP1	0.0010179	0.0192601	-1.72238
CAX4	0.00320788	0.0304926	-1.72082
IME1	0.00138978	0.0217768	-1.72027
CTF3	0.00213328	0.0258046	-1.71877
YHR214C-B	0.000820073	0.0179708	-1.71764
ECM9	0.00349199	0.0309646	-1.71297
SLM4	0.0040851	0.0331267	-1.7128
YLR227W-B	0.00394413	0.0326904	-1.71114
SEN15	0.00881974	0.0492447	-1.71068
COG1	0.00079665	0.0179708	-1.70981
PRY2	0.00148693	0.0226503	-1.70802
MLH2	0.000686718	0.0167718	-1.70681
SLX8	0.00180647	0.0239617	-1.70577
YLR446W	0.00896456	0.049577	-1.70519
MAD3	0.00253622	0.0276099	-1.70323
USE1	0.00274776	0.0284222	-1.7032
YPQ2	0.000965321	0.0189568	-1.70272
SPO1	0.00877455	0.0492447	-1.70232
YEH2	0.000277189	0.0127317	-1.70115
GPM2	0.00121807	0.0210252	-1.6968
SPC105	0.00326904	0.0306919	-1.69651
SPC42	0.0025561	0.0276099	-1.69615
SHE1	0.00334435	0.0309113	-1.69426
CUE4	0.00132428	0.0214198	-1.68864
SDS3	0.00157611	0.0229069	-1.68649
CIN1	0.00465184	0.0352521	-1.68641
PRP31	0.0050141	0.0370182	-1.68401
YDL176W	0.00600141	0.0402371	-1.68293
ASK10	0.00326049	0.0306919	-1.68286
ERG7	0.000246616	0.012515	-1.68265
PCL1	0.00492363	0.0366652	-1.68127
CSM2	0.00805544	0.0471953	-1.68069
SRO77	0.00232905	0.0265918	-1.68028
YRF1-1	0.00310128	0.0300007	-1.67851
CDC7	0.00122005	0.0210252	-1.6785
KEL1	0.00427433	0.0338826	-1.67847
MSB2	0.00348247	0.0309646	-1.67793
SPT14	0.00486379	0.0362645	-1.67588
BRE4	0.00238635	0.0269394	-1.67488
ESF1	0.00170642	0.0233406	-1.6748
OXP1	0.000292522	0.0128466	-1.6738
YAP7	0.00130584	0.021258	-1.67273
FLO9	0.00601851	0.0402371	-1.67115
EAF1	0.00362242	0.0312031	-1.67093
HOL1	0.00333693	0.0309113	-1.67067
YPP1	0.00025676	0.0126633	-1.67009
HOS1	0.00236399	0.0268009	-1.66963
DNM1	0.000314028	0.0130229	-1.66914
MNL1	0.00127745	0.0210988	-1.66899
YRF1-5	0.00367512	0.0314108	-1.66745
YOR238W	0.000969458	0.0189568	-1.66575
KTI11	0.00426479	0.0338826	-1.66097
YHR182W	0.00596768	0.0402371	-1.66085
TYW3	0.00340075	0.0309646	-1.65872
CKS1	0.00048205	0.0148623	-1.65805
YBR197C	0.000550887	0.0157094	-1.65597
MPS2	0.00648641	0.0422389	-1.65431
YHR131C	0.000996878	0.0189817	-1.65349
AAR2	0.0081632	0.047595	-1.65272
GAL2	0.00559623	0.0392999	-1.65126
YPL191C	0.00727374	0.0449344	-1.65117
YNL193W	0.00394489	0.0326904	-1.65115
YRF1-8	0.00398502	0.0327369	-1.65043
YMR315W	0.000272866	0.0127317	-1.64915
YKR015C	0.00623532	0.0412332	-1.64185
FAT1	0.000611922	0.0160548	-1.64103
RAD61	0.00115657	0.0204679	-1.63943
SWT21	0.00872763	0.0491143	-1.63869
LYS4	0.000944041	0.0188714	-1.63856
HYM1	0.00593822	0.0402371	-1.63818
SNF1	0.000467019	0.0147999	-1.63809
RSC30	0.00515712	0.0373776	-1.63799
DBF20	0.0010397	0.0194504	-1.63794
KIP3	0.00335274	0.0309113	-1.6374
EPL1	0.00123803	0.0210252	-1.63723
JJJ2	0.00525652	0.0377879	-1.63264
PPZ1	0.00225969	0.0263815	-1.63085
MEC3	0.00420522	0.0338655	-1.63078
ARG5,6	0.00293043	0.0293873	-1.62784
YMR178W	0.000339986	0.0133676	-1.62728
YRF1-4	0.00433452	0.0339627	-1.62655
GPM3	0.00174042	0.0235476	-1.62572
IMD4	0.000802783	0.0179708	-1.62558
AKR2	0.00403895	0.0328411	-1.62406
YFR018C	0.00123538	0.0210252	-1.62278
THI6	0.00157015	0.022894	-1.62266
NRT1	0.006354	0.0416471	-1.62228
APL1	0.001732	0.0235466	-1.62174
RDH54	0.00785552	0.0467062	-1.62156
COS6	0.00177608	0.0236431	-1.62025
HAT1	0.00118162	0.0207283	-1.61785
ERG13	0.00191197	0.0249011	-1.61744
MSH3	0.00123713	0.0210252	-1.61619
YGL036W	0.000656372	0.0163198	-1.61601
PMD1	0.00272532	0.0284222	-1.61556
PHO80	0.003479	0.0309646	-1.61551
APL3	0.00195378	0.0250083	-1.61518
RAD24	0.00172933	0.0235466	-1.6149
SHB17	0.00850931	0.0486612	-1.61486
SNO2	0.00518211	0.0374318	-1.61423
RIM9	0.00645559	0.0421468	-1.61409
GFA1	0.00165826	0.0233161	-1.61289
SEN2	0.00482314	0.036116	-1.61268
KCS1	0.000858155	0.0180071	-1.6095
PEP7	0.00483188	0.036116	-1.6094
STT4	0.00278303	0.0284304	-1.60938
RIM13	0.00797924	0.0470441	-1.60879
YMR245W	0.00676997	0.0432889	-1.60688
BIT2	0.00459569	0.0351337	-1.60686
SLD5	0.00574898	0.0398115	-1.60286
UGP1	0.00471845	0.0355351	-1.60206
YDR541C	0.00506781	0.0371413	-1.59891
GDE1	0.000988178	0.0189568	-1.59856
PBP2	0.00439859	0.034135	-1.59827
IRC15	0.00570291	0.039624	-1.59826
LYS14	0.00131503	0.0213276	-1.59825
YGR168C	0.00269221	0.0283695	-1.59735
NBP1	0.00717091	0.0446556	-1.59691
RTS2	0.00819856	0.0476866	-1.59651
YCR024C-B	0.00618365	0.0410674	-1.59531
MDM20	0.00532575	0.0381719	-1.59485
ECM3	0.002517	0.0276099	-1.5933
APC4	0.00497099	0.0368355	-1.59158
TRM12	0.00753199	0.0457316	-1.58957
PDR18	0.00866306	0.0489443	-1.5867
TAH11	0.00820246	0.0476866	-1.58487
HST2	0.00697963	0.0438834	-1.58483
SUC2	0.000893976	0.0182961	-1.58323
SGF73	0.00420229	0.0338655	-1.58163
MKK1	0.000719857	0.0171522	-1.58129
RAD30	0.00730946	0.0450047	-1.57997
GIS3	0.00547734	0.0388094	-1.57785
CLB3	0.00214002	0.0258046	-1.57687
ADD37	0.000765354	0.017712	-1.5739
TGL3	0.00201061	0.0252383	-1.57379
HIM1	0.00843972	0.0484559	-1.57354
DMA1	0.00471873	0.0355351	-1.5729
RAD57	0.00112191	0.0201779	-1.57268
SAP4	0.003579	0.0310748	-1.57264
YNL035C	0.00203706	0.0252383	-1.57235
EST2	0.00202985	0.0252383	-1.57112
PRO1	0.00859754	0.0487811	-1.57027
DCR2	0.00186252	0.0244156	-1.5695
FRK1	0.00211652	0.0256756	-1.56947
MSB3	0.0016191	0.0231048	-1.56818
YIL144W	0.00242648	0.0271378	-1.56809
YJL193W	0.00217292	0.0260357	-1.56759
YOL036W	0.0020076	0.0252383	-1.56731
CSE4	0.00898015	0.0496176	-1.56729
UGA2	0.00502965	0.0370524	-1.5665
TIP20	0.00242305	0.0271378	-1.5643
ERG11	0.00135409	0.02153	-1.56418
SSL2	0.00138715	0.0217768	-1.56343
PHO4	0.00595724	0.0402371	-1.56332
BPL1	0.00221914	0.0262243	-1.56302
YLL058W	0.00504127	0.0370524	-1.56272
AAT1	0.00478785	0.0359208	-1.56158
CCE1	0.00319125	0.0304926	-1.56033
SNG1	0.00375735	0.0318871	-1.55859
SLX4	0.00105922	0.0197316	-1.55747
RTC1	0.00440034	0.034135	-1.55587
DIG2	0.00732555	0.0450047	-1.55519
YSP2	0.00299604	0.0296224	-1.55422
UGA3	0.00142303	0.0220194	-1.55357
MKK2	0.0062468	0.0412591	-1.55324
YEL1	0.00255197	0.0276099	-1.55275
GCG1	0.002283	0.0264257	-1.55275
MEP2	0.00495757	0.0368268	-1.55112
YEA6	0.00434308	0.0339822	-1.54914
LAP2	0.0046088	0.0351337	-1.54807
ELO1	0.0019952	0.0252383	-1.54742
SLM5	0.00244639	0.0272088	-1.54684
OAF1	0.00259846	0.0279196	-1.54608
PMT7	0.00140647	0.0219223	-1.54587
YNR065C	0.00733	0.0450047	-1.54571
YDR261C-D	0.00440799	0.034135	-1.54477
PTR2	0.00757009	0.0459166	-1.54467
IRC21	0.00393678	0.0326904	-1.54312
CCH1	0.00779733	0.0465442	-1.54232
AMD1	0.00203852	0.0252383	-1.5392
MEC1	0.00348838	0.0309646	-1.5386
DBR1	0.00195112	0.0250083	-1.53822
YHR020W	0.00727171	0.0449344	-1.53752
PBP4	0.00162429	0.0231048	-1.53694
SWD3	0.00305728	0.0297184	-1.53672
YHR202W	0.00290829	0.0292628	-1.53572
ALG5	0.00403221	0.0328306	-1.53548
YNL165W	0.0071244	0.0445386	-1.53503
ECM30	0.00150068	0.0226736	-1.53492
SND1	0.0032014	0.0304926	-1.53357
YLR050C	0.0068636	0.0435636	-1.53353
MLH1	0.00318245	0.0304926	-1.53318
CSE1	0.000494645	0.0148814	-1.53316
ERV15	0.00284152	0.0288808	-1.53221
NAT3	0.0023574	0.0268009	-1.53141
ADE3	0.00720356	0.0446844	-1.52792
KRE6	0.00883543	0.0492447	-1.52674
SAC1	0.000642768	0.0163151	-1.5261
RKM2	0.00516103	0.0373776	-1.52555
VBA5	0.007632	0.0459583	-1.52544
LOT6	0.00682521	0.0434896	-1.52423
MMR1	0.00148131	0.0226503	-1.5235
YEL025C	0.00135614	0.02153	-1.52096
ROG1	0.00377609	0.032001	-1.52091
KAP120	0.00299348	0.0296224	-1.52053
EAR1	0.0059511	0.0402371	-1.52006
YBR138C	0.00697024	0.0438834	-1.51904
YDR109C	0.00348082	0.0309646	-1.51819
CTS2	0.00560352	0.0392999	-1.51776
EBS1	0.00317748	0.0304926	-1.51761
CMP2	0.00390147	0.032514	-1.51741
CNA1	0.000608768	0.0160548	-1.51691
SLA2	0.00140068	0.0218906	-1.51552
CMR2	0.00366144	0.0313546	-1.51535
MSH2	0.00168196	0.0233406	-1.51513
FRE8	0.00433494	0.0339627	-1.51442
MSH1	0.00324079	0.0306919	-1.51353
YND1	0.0015352	0.0227819	-1.51347
YLR173W	0.00384538	0.0322832	-1.5132
PEX4	0.00250123	0.0276099	-1.51275
FIG4	0.00561214	0.0392999	-1.51167
YMR1	0.0017068	0.0233406	-1.51164
GAL4	0.00681474	0.0434828	-1.51158
CHS3	0.00543622	0.038664	-1.51093
EUG1	0.000778051	0.0178824	-1.51079
UBP8	0.00671592	0.0430348	-1.50983
SKM1	0.008839	0.0492447	-1.50881
DAM1	0.00223612	0.0262243	-1.50847
ATG26	0.000854381	0.0180071	-1.50826
TEX1	0.00442294	0.0342067	-1.50531
ASI2	0.00450361	0.0346215	-1.5026
YPR053C	0.00344875	0.0309646	-1.5025
ACS2	0.00348315	0.0309646	-1.50198
YML119W	0.00275551	0.0284222	-1.50087
BET2	0.00466114	0.0352781	-1.50049
