# Supplementary material for: Transcriptomic analysis of nonylphenol effect on Saccharomyces cerevisiae
Source: PeerJ. 2021 Feb 11;9:e10794. doi: 10.7717/peerj.10794 (PMC7882136; doi:10.7717/peerj.10794)
Supplement: Supplemental Information 3 [file peerj-09-10794-s003.xlsx]

## Sheet: GO_Terms
GO Number	GO Terms	Enrichment score	P-value	Genes in list
GO:1903046	meiotic_cell_cycle_process	25.3909	9.39437e-12	76
GO:0006310	DNA_recombination	24.1048	3.39951e-11	75
GO:0051321	meiotic_cell_cycle	23.7694	4.7542e-11	89
GO:0022402	cell_cycle_process	22.0724	2.5947e-10	151
GO:0051704	multi_organism_process	21.6031	4.14872e-10	86
GO:0044419	interspecies_interaction_between_organisms	18.609	8.28348e-09	24
GO:0016032	viral_process&symbiosis_encompassing_mutualism_through_parasitism&viral_life_cycle&viral_release_from_host_cell	18.4725	9.49488e-09	23
GO:0000003	reproduction	18.0703	1.41961e-08	118
GO:0000280	nuclear_division	17.9334	1.6279e-08	90
GO:0003964	RNA_directed_DNA_polymerase_activity	17.5488	2.39134e-08	24
GO:0044712	single_organism_catabolic_process	17.4855	2.54762e-08	102
GO:0032989	cellular_component_morphogenesis	17.3149	3.02149e-08	38
GO:0048285	organelle_fission	17.1754	3.47403e-08	91
GO:0006772	thiamine_metabolic_process	16.9963	4.1552e-08	12
GO:0070726	cell_wall_assembly	16.7916	5.09942e-08	25
GO:0010927	cellular_component_assembly_involved_in_morphogenesis	16.4961	6.85201e-08	30
GO:0015074	DNA_integration	16.3504	7.92674e-08	23
GO:0004523	RNA_DNA_hybrid_ribonuclease_activity	15.8694	1.28234e-07	23
GO:0042723	thiamine_containing_compound_metabolic_process	15.7588	1.43228e-07	12
GO:0071940	fungal_type_cell_wall_assembly	15.6483	1.5996e-07	24
GO:0005886	plasma_membrane	15.5214	1.81605e-07	110
GO:0042724	thiamine_containing_compound_biosynthetic_process&thiamine_biosynthetic_process	15.3215	2.218e-07	11
GO:0070001	aspartic_type_peptidase_activity&aspartic_type_endopeptidase_activity	15.2133	2.47133e-07	24
GO:0071944	cell_periphery	14.9796	3.12221e-07	145
GO:0006278	RNA_dependent_DNA_replication	14.8091	3.70233e-07	28
GO:0030476	ascospore_wall_assembly&spore_wall_assembly&spore_wall_biogenesis&ascospore_wall_biogenesis	14.5275	4.90668e-07	23
GO:0000943	retrotransposon_nucleocapsid	14.5275	4.90668e-07	23
GO:0007126	meiotic_nuclear_division	14.509	4.99834e-07	51
GO:0022891	substrate_specific_transmembrane_transporter_activity	14.2774	6.30099e-07	79
GO:0032197	transposition_RNA_mediated	14.1524	7.14e-07	27
GO:0022892	substrate_specific_transporter_activity	14.1279	7.31663e-07	91
GO:0016893	endonuclease_activity_active_with_either_ribo_or_deoxyribonucleic_acids_and_producing_5_phosphomonoesters	14.1083	7.4621e-07	29
GO:0022413	reproductive_process_in_single_celled_organism	14.1072	7.47032e-07	46
GO:0007127	meiosis_I	13.9553	8.69558e-07	34
GO:0034061	DNA_polymerase_activity	13.8461	9.69905e-07	26
GO:0022857	transmembrane_transporter_activity	13.7072	1.11439e-06	85
GO:0008324	cation_transmembrane_transporter_activity	13.4003	1.51475e-06	47
GO:0005576	extracellular_region	13.2935	1.68537e-06	32
GO:0003887	DNA_directed_DNA_polymerase_activity	13.1893	1.87043e-06	25
GO:1901565	organonitrogen_compound_catabolic_process	12.9776	2.31151e-06	35
GO:0032196	transposition	12.8321	2.67351e-06	27
GO:0016891	endoribonuclease_activity_producing_5_phosphomonoesters	12.8309	2.67671e-06	26
GO:0048869	cellular_developmental_process	12.5651	3.4917e-06	63
GO:0009653	anatomical_structure_morphogenesis&anatomical_structure_development	12.4719	3.83271e-06	56
GO:0005215	transporter_activity	12.4519	3.91012e-06	100
GO:0044764	multi_organism_cellular_process	12.435	3.97683e-06	51
GO:0015075	ion_transmembrane_transporter_activity	12.4228	4.02569e-06	60
GO:0055085	transmembrane_transport	12.1536	5.26916e-06	93
GO:0071897	DNA_biosynthetic_process	11.4234	1.09368e-05	28
GO:0004521	endoribonuclease_activity	11.4234	1.09368e-05	28
GO:0032502	developmental_process	11.2709	1.27388e-05	75
GO:0004519	endonuclease_activity	11.1473	1.44145e-05	37
GO:0044767	single_organism_developmental_process	10.9958	1.67728e-05	74
GO:0045132	meiotic_chromosome_segregation	10.9204	1.80852e-05	21
GO:0009277	fungal_type_cell_wall	10.9202	1.80887e-05	31
GO:0048646	anatomical_structure_formation_involved_in_morphogenesis	10.8179	2.00369e-05	48
GO:0032505	reproduction_of_a_single_celled_organism	10.7666	2.10914e-05	53
GO:0003006	developmental_process_involved_in_reproduction&single_organism_reproductive_process	10.7217	2.206e-05	45
GO:0000819	sister_chromatid_segregation	10.5808	2.53999e-05	34
GO:0009272	fungal_type_cell_wall_biogenesis	10.567	2.57521e-05	27
GO:0030437	ascospore_formation(4)&cell_development	10.4642	2.85409e-05	33
GO:0000793	condensed_chromosome	10.4174	2.99079e-05	36
GO:0030435	sporulation_resulting_in_formation_of_a_cellular_spore	10.3653	3.15084e-05	46
GO:0000794	condensed_nuclear_chromosome	10.35	3.19926e-05	32
GO:0030154	cell_differentiation	10.3204	3.29527e-05	53
GO:0007131	reciprocal_meiotic_recombination&reciprocal_DNA_recombination	10.2912	3.39289e-05	22
GO:0034293	sexual_sporulation&sexual_sporulation_resulting_in_formation_of_a_cellular_spore	10.1676	3.83939e-05	34
GO:0042546	cell_wall_biogenesis	10.13	3.98638e-05	30
GO:0007059	chromosome_segregation	10.0216	4.44317e-05	51
GO:0031225	anchored_component_of_membrane	9.9957	4.55956e-05	22
GO:0043934	sporulation	9.88644	5.08599e-05	46
GO:0030312	external_encapsulating_structure&cell_wall	9.80687	5.50722e-05	31
GO:0070192	chromosome_organization_involved_in_meiosis	9.75398	5.80633e-05	16
GO:0016054	organic_acid_catabolic_process&carboxylic_acid_catabolic_process	9.69323	6.16999e-05	28
GO:0044282	small_molecule_catabolic_process	9.64215	6.49336e-05	33
GO:0022890	inorganic_cation_transmembrane_transporter_activity	9.60562	6.73493e-05	37
GO:0016788	hydrolase_activity_acting_on_ester_bonds	9.56917	6.9849e-05	73
GO:0009145	purine_nucleoside_triphosphate_biosynthetic_process&purine_ribonucleoside_triphosphate_biosynthetic_process	9.47616	7.66576e-05	11
GO:0019752	carboxylic_acid_metabolic_process	9.46435	7.75682e-05	89
GO:0006754	ATP_biosynthetic_process	9.36539	8.56376e-05	10
GO:0015077	monovalent_inorganic_cation_transmembrane_transporter_activity	9.24801	9.63027e-05	28
GO:0022414	reproductive_process	9.24254	9.68318e-05	64
GO:0006096	glycolytic_process	9.18723	0.000102338	14
GO:0015672	monovalent_inorganic_cation_transport	9.1504	0.000106178	29
GO:0009063	cellular_amino_acid_catabolic_process	9.09868	0.000111813	21
GO:1901564	organonitrogen_compound_metabolic_process	9.08338	0.000113538	124
GO:0019953	sexual_reproduction&multi_organism_reproductive_process	9.03483	0.000119186	57
GO:0006259	DNA_metabolic_process	9.02419	0.000120461	112
GO:0043436	oxoacid_metabolic_process	9.00121	0.000123261	91
GO:0032787	monocarboxylic_acid_metabolic_process	8.9982	0.000123632	41
GO:0022604	regulation_of_cell_morphogenesis	8.92957	0.000132414	11
GO:0006082	organic_acid_metabolic_process	8.90993	0.000135041	91
GO:0032300	mismatch_repair_complex	8.84142	0.000144618	7
GO:0030983	mismatched_DNA_binding	8.84142	0.000144618	7
GO:0006260	DNA_replication	8.79098	0.000152099	52
GO:0045229	external_encapsulating_structure_organization&cell_wall_organization	8.79098	0.000152099	52
GO:0008360	regulation_of_cell_shape	8.65755	0.000173809	9
GO:0051302	regulation_of_cell_division	8.62595	0.000179389	35
GO:0000075	cell_cycle_checkpoint	8.58796	0.000186336	26
GO:0051783	regulation_of_nuclear_division	8.51997	0.000199445	33
GO:0015103	inorganic_anion_transmembrane_transporter_activity	8.49784	0.000203909	13
GO:0000070	mitotic_sister_chromatid_segregation	8.47959	0.000207664	30
GO:0006090	pyruvate_metabolic_process	8.35174	0.000235986	17
GO:0034220	ion_transmembrane_transport	8.24767	0.000261868	38
GO:0010564	regulation_of_cell_cycle_process	8.23974	0.000263952	40
GO:0009065	glutamine_family_amino_acid_catabolic_process	8.21582	0.000270343	10
GO:0046434	organophosphate_catabolic_process	8.03923	0.000322559	14
GO:0072528	pyrimidine_containing_compound_biosynthetic_process	8.03923	0.000322559	14
GO:0072527	pyrimidine_containing_compound_metabolic_process	8.01657	0.000329949	15
GO:0015851	nucleobase_transport&nucleobase_transmembrane_transporter_activity	7.97043	0.000345531	7
GO:0000795	synaptonemal_complex	7.97043	0.000345531	7
GO:0007135	meiosis_II&meiotic_sister_chromatid_segregation	7.94757	0.00035352	8
GO:0005524	ATP_binding	7.90743	0.000368	131
GO:0032559	adenyl_ribonucleotide_binding	7.83993	0.000393695	131
GO:0015630	microtubule_cytoskeleton	7.82112	0.000401172	34
GO:0009142	nucleoside_triphosphate_biosynthetic_process	7.80882	0.000406136	12
GO:0045839	negative_regulation_of_mitotic_nuclear_division	7.72067	0.000443565	16
GO:0016052	carbohydrate_catabolic_process	7.70444	0.000450823	27
GO:0098660	inorganic_ion_transmembrane_transport	7.65366	0.000474306	28
GO:0004540	ribonuclease_activity	7.65366	0.000474306	28
GO:0030554	adenyl_nucleotide_binding	7.57387	0.000513699	131
GO:0009205	purine_ribonucleoside_triphosphate_metabolic_process	7.55933	0.000521225	18
GO:0051276	chromosome_organization	7.52479	0.000539545	106
GO:0009201	ribonucleoside_triphosphate_biosynthetic_process	7.52456	0.000539666	11
GO:0046034	ATP_metabolic_process	7.48854	0.000559461	17
GO:0098662	inorganic_cation_transmembrane_transport	7.44148	0.000586414	25
GO:0022804	active_transmembrane_transporter_activity	7.35349	0.000640351	34
GO:0008519	ammonium_transmembrane_transporter_activity&organic_cation_transmembrane_transporter_activity	7.3276	0.000657151	8
GO:0044724	single_organism_carbohydrate_catabolic_process	7.31234	0.000667257	24
GO:0000226	microtubule_cytoskeleton_organization	7.24295	0.000715198	30
GO:0098655	cation_transmembrane_transport	7.19853	0.000747687	26
GO:0007067	mitotic_nuclear_division	7.15607	0.000780115	50
GO:0009064	glutamine_family_amino_acid_metabolic_process	7.15512	0.000780853	19
GO:0051784	negative_regulation_of_nuclear_division	7.14945	0.000785299	21
GO:0022603	regulation_of_anatomical_structure_morphogenesis	7.12027	0.000808547	11
GO:0098687	chromosomal_region	7.07648	0.000844739	37
GO:0000780	condensed_nuclear_chromosome_centromeric_region	7.05709	0.000861279	18
GO:0009144	purine_nucleoside_triphosphate_metabolic_process	7.05709	0.000861279	18
GO:0015291	secondary_active_transmembrane_transporter_activity	7.05709	0.000861279	18
GO:0031505	fungal_type_cell_wall_organization	6.9546	0.000954236	38
GO:0051782	negative_regulation_of_cell_division	6.93719	0.000970993	21
GO:0005819	spindle	6.93519	0.000972938	29
GO:1901606	alpha_amino_acid_catabolic_process	6.8847	0.00102332	16
GO:0043570	maintenance_of_DNA_repeat_elements	6.82697	0.00108414	10
GO:0006298	mismatch_repair	6.82697	0.00108414	10
GO:0006312	mitotic_recombination	6.81899	0.00109283	18
GO:0000779	condensed_chromosome_centromeric_region	6.81744	0.00109452	20
GO:0008509	anion_transmembrane_transporter_activity	6.81251	0.00109993	27
GO:0015696	ammonium_transport	6.77629	0.00114049	8
GO:0005753	mitochondrial_proton_transporting_ATP_synthase_complex&proton_transporting_ATP_synthase_complex&energy_coupled_proton_transport_down_electrochemical_gradient&ATP_synthesis_coupled_proton_transport&proton_transporting_ATP_synthase_activity_rotational_mechanism	6.77629	0.00114049	8
GO:0033046	negative_regulation_of_sister_chromatid_segregation&negative_regulation_of_mitotic_sister_chromatid_segregation	6.75911	0.00116026	14
GO:0044283	small_molecule_biosynthetic_process	6.74739	0.00117394	66
GO:0006766	vitamin_metabolic_process&water_soluble_vitamin_metabolic_process	6.71969	0.00120691	17
GO:0006811	ion_transport	6.66856	0.00127022	68
GO:0005815	microtubule_organizing_center&spindle_pole_body	6.66152	0.0012792	22
GO:0033045	regulation_of_sister_chromatid_segregation&regulation_of_mitotic_sister_chromatid_segregation	6.62799	0.00132283	16
GO:0009110	vitamin_biosynthetic_process&water_soluble_vitamin_biosynthetic_process	6.62799	0.00132283	16
GO:0000755	cytogamy	6.60187	0.00135782	7
GO:0045003	double_strand_break_repair_via_synthesis_dependent_strand_annealing	6.60187	0.00135782	7
GO:1901678	iron_coordination_entity_transport	6.60187	0.00135782	7
GO:0009199	ribonucleoside_triphosphate_metabolic_process	6.58905	0.00137535	18
GO:0000723	telomere_maintenance(4)&anatomical_structure_homeostasis	6.47048	0.00154848	22
GO:0009084	glutamine_family_amino_acid_biosynthetic_process	6.3889	0.0016801	11
GO:0007062	sister_chromatid_cohesion	6.38129	0.00169294	16
GO:0007017	microtubule_based_process	6.31946	0.00180092	31
GO:0030071	regulation_of_mitotic_metaphase_anaphase_transition&regulation_of_metaphase_anaphase_transition_of_cell_cycle	6.28843	0.00185767	15
GO:0032200	telomere_organization	6.28464	0.00186473	22
GO:0006812	cation_transport	6.28132	0.00187093	41
GO:0071554	cell_wall_organization_or_biogenesis	6.22123	0.00198679	55
GO:0051985	negative_regulation_of_chromosome_segregation	6.20566	0.00201797	14
GO:0004175	endopeptidase_activity	6.16389	0.00210405	28
GO:0004518	nuclease_activity	6.16363	0.0021046	37
GO:0007088	regulation_of_mitotic_nuclear_division	6.10382	0.00223432	22
GO:0051983	regulation_of_chromosome_segregation	6.07329	0.00230357	19
GO:0016298	lipase_activity	6.06557	0.00232144	10
GO:0051726	regulation_of_cell_cycle	6.0064	0.00246293	48
GO:0000777	condensed_chromosome_kinetochore	5.94482	0.00261938	18
GO:0010948	negative_regulation_of_cell_cycle_process	5.92788	0.00266413	22
GO:0009141	nucleoside_triphosphate_metabolic_process	5.87708	0.00280297	19
GO:0060236	regulation_of_mitotic_spindle_organization&regulation_of_spindle_organization	5.86887	0.00282607	6
GO:1901605	alpha_amino_acid_metabolic_process	5.86696	0.00283146	42
GO:2000816	negative_regulation_of_mitotic_sister_chromatid_separation&spindle_checkpoint&negative_regulation_of_mitotic_metaphase_anaphase_transition&mitotic_spindle_checkpoint&negative_regulation_of_metaphase_anaphase_transition_of_cell_cycle	5.86396	0.00283996	13
GO:0016772	transferase_activity_transferring_phosphorus_containing_groups	5.81837	0.00297245	75
GO:0007091	metaphase_anaphase_transition_of_mitotic_cell_cycle&metaphase_anaphase_transition_of_cell_cycle&mitotic_sister_chromatid_separation&regulation_of_mitotic_sister_chromatid_separation	5.80505	0.00301231	15
GO:0003677	DNA_binding	5.74494	0.00319893	112
GO:0000775	chromosome_centromeric_region	5.72382	0.00326721	24
GO:0016042	lipid_catabolic_process	5.69644	0.00335789	16
GO:0009126	purine_nucleoside_monophosphate_metabolic_process&purine_ribonucleoside_monophosphate_metabolic_process	5.64383	0.0035393	20
GO:0032435	negative_regulation_of_proteasomal_ubiquitin_dependent_protein_catabolic_process	5.60489	0.00367981	13
GO:0032434	regulation_of_proteasomal_ubiquitin_dependent_protein_catabolic_process	5.57796	0.00378026	15
GO:0006525	arginine_metabolic_process	5.55865	0.00385398	7
GO:0034087	establishment_of_mitotic_sister_chromatid_cohesion	5.55865	0.00385398	7
GO:0016491	oxidoreductase_activity	5.51942	0.00400818	68
GO:0016773	phosphotransferase_activity_alcohol_group_as_acceptor	5.4884	0.00413446	43
GO:0070069	cytochrome_complex	5.4295	0.00438529	8
GO:0000922	spindle_pole	5.42782	0.00439266	22
GO:0051304	chromosome_separation	5.41502	0.00444926	17
GO:0006091	generation_of_precursor_metabolites_and_energy	5.40372	0.00449981	41
GO:0071852	fungal_type_cell_wall_organization_or_biogenesis	5.36226	0.0046903	40
GO:0000778	condensed_nuclear_chromosome_kinetochore	5.35995	0.00470114	15
GO:1901799	negative_regulation_of_proteasomal_protein_catabolic_process	5.35805	0.00471007	13
GO:0009127	purine_nucleoside_monophosphate_biosynthetic_process&purine_ribonucleoside_monophosphate_biosynthetic_process	5.35805	0.00471007	13
GO:0055114	oxidation_reduction_process	5.32509	0.0048679	84
GO:0055086	nucleobase_containing_small_molecule_metabolic_process	5.295	0.00501659	51
GO:0005975	carbohydrate_metabolic_process	5.29359	0.00502368	68
GO:0044459	plasma_membrane_part	5.26993	0.00514395	22
GO:0006753	nucleoside_phosphate_metabolic_process	5.18803	0.005583	45
GO:0031023	microtubule_organizing_center_organization&spindle_pole_body_organization	5.17475	0.00565762	11
GO:0005619	ascospore_wall	5.12193	0.00596447	7
GO:0051301	cell_division	5.09423	0.00613202	71
GO:0033044	regulation_of_chromosome_organization	5.08686	0.00617741	29
GO:0007346	regulation_of_mitotic_cell_cycle	5.08686	0.00617741	29
GO:0016620	oxidoreductase_activity_acting_on_the_aldehyde_or_oxo_group_of_donors_NAD_or_NADP_as_acceptor	5.05915	0.00635097	8
GO:0009117	nucleotide_metabolic_process	5.0473	0.00642668	44
GO:0016810	hydrolase_activity_acting_on_carbon_nitrogen_but_not_peptide_bonds	4.98356	0.00684966	19
GO:0031145	anaphase_promoting_complex_dependent_proteasomal_ubiquitin_dependent_protein_catabolic_process	4.94937	0.00708787	15
GO:0061136	regulation_of_proteasomal_protein_catabolic_process	4.94937	0.00708787	15
GO:0008202	steroid_metabolic_process(5)&sterol_metabolic_process	4.94937	0.00708787	15
GO:1901615	organic_hydroxy_compound_metabolic_process	4.90916	0.0073787	34
GO:0042177	negative_regulation_of_protein_catabolic_process&negative_regulation_of_cellular_protein_catabolic_process&negative_regulation_of_proteolysis_involved_in_cellular_protein_catabolic_process	4.89812	0.00746061	13
GO:0006066	alcohol_metabolic_process	4.87628	0.00762532	30
GO:0045786	negative_regulation_of_cell_cycle	4.8464	0.00785661	24
GO:0022610	biological_adhesion&cell_adhesion	4.82901	0.00799441	6
GO:0016840	carbon_nitrogen_lyase_activity	4.82901	0.00799441	6
GO:0005628	prospore_membrane&intracellular_immature_spore&ascospore_type_prospore	4.82094	0.00805921	19
GO:1901566	organonitrogen_compound_biosynthetic_process	4.7816	0.00838258	74
GO:0000902	cell_morphogenesis	4.77886	0.00840558	12
GO:0007064	mitotic_sister_chromatid_cohesion	4.77886	0.00840558	12
GO:0007129	synapsis	4.75841	0.00857926	9
GO:0034085	establishment_of_sister_chromatid_cohesion	4.72953	0.00883061	7
GO:0007020	microtubule_nucleation	4.72953	0.00883061	7
GO:0031160	spore_wall	4.72953	0.00883061	7
GO:0040020	regulation_of_meiosis	4.68371	0.00924463	13
GO:0000776	kinetochore	4.67086	0.00936423	18
GO:1901136	carbohydrate_derivative_catabolic_process	4.66646	0.00940548	11
GO:0005694	chromosome	4.60043	0.0100475	80
GO:1903362	regulation_of_cellular_protein_catabolic_process&regulation_of_proteolysis_involved_in_cellular_protein_catabolic_process	4.57005	0.0103574	15
GO:0098743	cell_aggregation(2)&aggregation_of_unicellular_organisms	4.5652	0.0104078	5
GO:0033313	meiotic_cell_cycle_checkpoint	4.5652	0.0104078	5
GO:0015203	polyamine_transmembrane_transporter_activity	4.5652	0.0104078	5
GO:0016233	telomere_capping	4.5652	0.0104078	5
GO:0046785	microtubule_polymerization	4.56368	0.0104236	10
GO:0044723	single_organism_carbohydrate_metabolic_process	4.55823	0.0104806	57
GO:0050793	regulation_of_developmental_process	4.55582	0.0105059	12
GO:0045930	negative_regulation_of_mitotic_cell_cycle	4.52054	0.0108831	17
GO:0072521	purine_containing_compound_metabolic_process	4.49833	0.0111275	29
GO:1901991	negative_regulation_of_mitotic_cell_cycle_phase_transition	4.47889	0.0113459	13
GO:0051445	regulation_of_meiotic_cell_cycle	4.47889	0.0113459	13
GO:0006163	purine_nucleotide_metabolic_process	4.42881	0.0119287	23
GO:0046496	nicotinamide_nucleotide_metabolic_process	4.42611	0.0119609	14
GO:0006739	NADP_metabolic_process	4.40743	0.0121864	8
GO:0090502	RNA_phosphodiester_bond_hydrolysis_endonucleolytic	4.39222	0.0123732	26
GO:1902600	hydrogen_ion_transmembrane_transport	4.39122	0.0123856	15
GO:0006144	purine_nucleobase_metabolic_process	4.37484	0.0125901	7
GO:0015992	proton_transport	4.35939	0.0127861	17
GO:0010639	negative_regulation_of_organelle_organization	4.32065	0.0132913	30
GO:0016301	kinase_activity	4.31157	0.0134125	45
GO:0019362	pyridine_nucleotide_metabolic_process	4.24343	0.0143583	14
GO:2001251	negative_regulation_of_chromosome_organization	4.23341	0.0145029	20
GO:1990391	DNA_repair_complex	4.21153	0.0148237	11
GO:0031109	microtubule_polymerization_or_depolymerization	4.21153	0.0148237	11
GO:0007094	mitotic_spindle_assembly_checkpoint&spindle_assembly_checkpoint	4.21043	0.01484	9
GO:1901990	regulation_of_mitotic_cell_cycle_phase_transition	4.20677	0.0148944	16
GO:0015078	hydrogen_ion_transmembrane_transporter_activity	4.20364	0.0149411	17
GO:0006818	hydrogen_transport	4.20364	0.0149411	17
GO:0072524	pyridine_containing_compound_metabolic_process	4.20364	0.0149411	17
GO:0044427	chromosomal_part	4.17049	0.0154447	72
GO:0006520	cellular_amino_acid_metabolic_process	4.16439	0.0155391	51
GO:0006820	anion_transport	4.15311	0.0157154	35
GO:0015698	inorganic_anion_transport	4.14151	0.0158988	12
GO:0009161	ribonucleoside_monophosphate_metabolic_process	4.12167	0.0162174	21
GO:0019637	organophosphate_metabolic_process	4.10455	0.0164975	73
GO:1901988	negative_regulation_of_cell_cycle_phase_transition	4.09595	0.0166399	13
GO:0090599	alpha_glucosidase_activity	4.0908	0.0167259	5
GO:0006526	arginine_biosynthetic_process	4.0908	0.0167259	5
GO:0005381	iron_ion_transmembrane_transporter_activity	4.0908	0.0167259	5
GO:0000276	mitochondrial_proton_transporting_ATP_synthase_complex_coupling_factor_F_o&proton_transporting_ATP_synthase_complex_coupling_factor_F_o	4.0908	0.0167259	5
GO:0015294	solute_cation_symporter_activity	4.0908	0.0167259	5
GO:0045143	homologous_chromosome_segregation	4.08407	0.0168387	10
GO:0032886	regulation_of_microtubule_based_process&regulation_of_microtubule_cytoskeleton_organization	4.08407	0.0168387	10
GO:0000722	telomere_maintenance_via_recombination	4.08407	0.0168387	10
GO:0090484	drug_transporter_activity	4.05265	0.0173763	7
GO:0042176	regulation_of_protein_catabolic_process	4.04933	0.0174341	16
GO:0034308	primary_alcohol_metabolic_process&ethanol_metabolic_process	4.02884	0.017795	6
GO:0019693	ribose_phosphate_metabolic_process	4.0262	0.0178419	28
GO:0000228	nuclear_chromosome	3.97244	0.0188274	59
GO:1903047	mitotic_cell_cycle_process	3.9444	0.0193628	70
GO:0003690	double_stranded_DNA_binding	3.91688	0.0199031	13
GO:0042451	purine_nucleoside_biosynthetic_process&purine_ribonucleoside_biosynthetic_process	3.91688	0.0199031	13
GO:0044772	mitotic_cell_cycle_phase_transition	3.91486	0.0199434	30
GO:0031329	regulation_of_cellular_catabolic_process	3.90081	0.0202255	25
GO:0009895	negative_regulation_of_catabolic_process&negative_regulation_of_cellular_catabolic_process	3.89988	0.0202443	14
GO:1901987	regulation_of_cell_cycle_phase_transition	3.89742	0.0202941	16
GO:0006541	glutamine_metabolic_process	3.85282	0.0212197	8
GO:0005746	mitochondrial_respiratory_chain	3.85282	0.0212197	8
GO:0019829	cation_transporting_ATPase_activity	3.80287	0.0223066	11
GO:0016053	organic_acid_biosynthetic_process&carboxylic_acid_biosynthetic_process	3.78382	0.0227356	38
GO:0051119	sugar_transmembrane_transporter_activity	3.75874	0.023313	7
GO:1901659	glycosyl_compound_biosynthetic_process	3.75084	0.0234979	16
GO:0009123	nucleoside_monophosphate_metabolic_process	3.74959	0.0235274	21
GO:0010955	negative_regulation_of_protein_processing&negative_regulation_of_proteolysis	3.74552	0.0236234	13
GO:0016310	phosphorylation	3.74261	0.0236921	64
GO:0098656	anion_transmembrane_transport	3.74085	0.023734	15
GO:0006164	purine_nucleotide_biosynthetic_process	3.74085	0.023734	15
GO:0005887	integral_component_of_plasma_membrane	3.73209	0.0239426	9
GO:0070469	respiratory_chain	3.73209	0.0239426	9
GO:0004674	protein_serine_threonine_kinase_activity	3.72339	0.024152	28
GO:0016746	transferase_activity_transferring_acyl_groups	3.72339	0.024152	28
GO:0005355	glucose_transmembrane_transporter_activity	3.69315	0.0248934	6
GO:0030474	spindle_pole_body_duplication	3.69315	0.0248934	6
GO:0044272	sulfur_compound_biosynthetic_process	3.6846	0.0251072	19
GO:0007534	gene_conversion_at_mating_type_locus	3.68288	0.0251505	5
GO:0015846	polyamine_transport	3.68288	0.0251505	5
GO:0009150	purine_ribonucleotide_metabolic_process	3.63227	0.0264561	21
GO:0044770	cell_cycle_phase_transition	3.63148	0.0264768	30
GO:0009894	regulation_of_catabolic_process	3.62996	0.0265173	26
GO:0015850	organic_hydroxy_compound_transport	3.61405	0.0269425	11
GO:0008608	attachment_of_spindle_microtubules_to_kinetochore&microtubule_anchoring	3.60571	0.0271682	8
GO:0000278	mitotic_cell_cycle	3.60022	0.0273178	71
GO:0000724	double_strand_break_repair_via_homologous_recombination	3.59313	0.0275121	15
GO:0008080	N_acetyltransferase_activity	3.59047	0.0275854	12
GO:0008643	carbohydrate_transport	3.59047	0.0275854	12
GO:0070613	regulation_of_protein_processing	3.58147	0.0278349	13
GO:0051129	negative_regulation_of_cellular_component_organization	3.54083	0.0289892	30
GO:0016779	nucleotidyltransferase_activity	3.53216	0.0292417	28
GO:0030162	regulation_of_proteolysis	3.45087	0.031718	15
GO:0009156	ribonucleoside_monophosphate_biosynthetic_process	3.43421	0.032251	14
GO:0016410	N_acyltransferase_activity	3.42437	0.0325699	13
GO:0046352	disaccharide_catabolic_process	3.3916	0.0336549	6
GO:0042138	meiotic_DNA_double_strand_break_formation	3.3916	0.0336549	6
GO:0015145	monosaccharide_transmembrane_transporter_activity&hexose_transmembrane_transporter_activity	3.3916	0.0336549	6
GO:0001100	negative_regulation_of_exit_from_mitosis	3.3916	0.0336549	6
GO:0006730	one_carbon_metabolic_process	3.3916	0.0336549	6
GO:0015293	symporter_activity	3.3916	0.0336549	6
GO:0016747	transferase_activity_transferring_acyl_groups_other_than_amino_acyl_groups	3.39	0.0337088	23
GO:0090595	acetyl_CoA_L_lysine_N6_acetyltransferase&histone_acetyltransferase_activity	3.37611	0.03418	8
GO:0016538	cyclin_dependent_protein_serine_threonine_kinase_regulator_activity	3.37611	0.03418	8
GO:1901618	organic_hydroxy_compound_transmembrane_transporter_activity	3.34078	0.0354092	4
GO:0045275	respiratory_chain_complex_III&mitochondrial_respiratory_chain_complex_III	3.34078	0.0354092	4
GO:0000217	DNA_secondary_structure_binding	3.32777	0.0358731	5
GO:0000023	maltose_metabolic_process	3.32777	0.0358731	5
GO:0016407	acetyltransferase_activity	3.31385	0.0363757	15
GO:0007093	mitotic_cell_cycle_checkpoint	3.29105	0.0372148	14
GO:0044454	nuclear_chromosome_part	3.28038	0.0376141	52
GO:1901476	carbohydrate_transporter_activity&carbohydrate_transmembrane_transporter_activity	3.24261	0.0390617	7
GO:0005875	microtubule_associated_complex	3.24261	0.0390617	7
GO:0016769	transferase_activity_transferring_nitrogenous_groups&transaminase_activity	3.24261	0.0390617	7
GO:0019318	hexose_metabolic_process	3.21189	0.0402805	19
GO:0051128	regulation_of_cellular_component_organization	3.18285	0.0414672	72
GO:0015849	organic_acid_transport	3.16998	0.0420043	18
GO:0015926	glucosidase_activity	3.16242	0.0423231	8
GO:0016903	oxidoreductase_activity_acting_on_the_aldehyde_or_oxo_group_of_donors	3.16242	0.0423231	8
GO:0003333	amino_acid_transmembrane_transport	3.121	0.0441132	9
GO:0006094	gluconeogenesis	3.121	0.0441132	9
GO:0015932	nucleobase_containing_compound_transmembrane_transporter_activity	3.121	0.0441132	9
GO:0000079	regulation_of_cyclin_dependent_protein_serine_threonine_kinase_activity	3.121	0.0441132	9
GO:1901607	alpha_amino_acid_biosynthetic_process	3.12079	0.0441224	27
GO:0009313	oligosaccharide_catabolic_process	3.11932	0.0441873	6
GO:0045834	positive_regulation_of_lipid_metabolic_process	3.11932	0.0441873	6
GO:0031226	intrinsic_component_of_plasma_membrane	3.10363	0.0448861	10
GO:0042625	ATPase_activity_coupled_to_transmembrane_movement_of_ions	3.10222	0.0449493	11
GO:0052689	carboxylic_ester_hydrolase_activity	3.10222	0.0449493	11
GO:0072522	purine_containing_compound_biosynthetic_process	3.091	0.0454563	16
GO:0004672	protein_kinase_activity	3.08905	0.0455454	28
GO:0005856	cytoskeleton	3.07931	0.0459911	46
GO:0009124	nucleoside_monophosphate_biosynthetic_process	3.02129	0.0487385	14
GO:0042455	ribonucleoside_biosynthetic_process	3.02129	0.0487385	14
GO:0046835	carbohydrate_phosphorylation&carbohydrate_kinase_activity	3.01564	0.0490145	5
GO:0071459	protein_localization_to_chromosome_centromeric_region	3.01564	0.0490145	5
