# Supplementary material for: Transcriptomic analysis of nonylphenol effect on Saccharomyces cerevisiae
Source: PeerJ. 2021 Feb 11;9:e10794. doi: 10.7717/peerj.10794 (PMC7882136; doi:10.7717/peerj.10794)
Supplement: Supplemental Information 4 [file peerj-09-10794-s004.xlsx]

## Sheet: Pathway
Pathway	Enrichment score	P-value	Genes in list
Glycolysis / Gluconeogenesis	12.6631	3.16585e-06	22
Metabolic pathways	12.5984	3.37735e-06	138
Arginine biosynthesis	11.3006	1.23659e-05	11
Meiosis - yeast	11.1885	1.38324e-05	37
Galactose metabolism	10.2438	3.5577e-05	12
Biosynthesis of amino acids	9.31127	9.03993e-05	33
Thiamine metabolism	9.26448	9.47301e-05	10
Biosynthesis of antibiotics	9.13865	0.000107432	53
Alanine, aspartate and glutamate metabolism	8.32567	0.000242218	13
Cell cycle - yeast	8.27981	0.000253587	33
Atrazine degradation	7.75426	0.000428913	4
Carbon metabolism	7.0349	0.000880603	29
Oxidative phosphorylation	6.59615	0.00136562	19
Methane metabolism	6.15638	0.00211991	10
Arginine and proline metabolism	5.05827	0.00635657	8
Biosynthesis of secondary metabolites	4.69649	0.00912722	57
Starch and sucrose metabolism	4.57495	0.0103069	12
Fructose and mannose metabolism	4.44056	0.0117893	8
Amino sugar and nucleotide sugar metabolism	4.23309	0.0145075	10
Mismatch repair	4.03952	0.017606	7
Propanoate metabolism	3.53713	0.0290966	5
Glyoxylate and dicarboxylate metabolism	3.24276	0.0390558	8
Tyrosine metabolism	3.21753	0.0400538	5
Biotin metabolism	3.15383	0.0426884	3
Fatty acid degradation	3.09799	0.0451398	6

## Sheet: GO
Gene set	Enrichment score	P-value	Genes in list
meiotic_cell_cycle_process(4)	25.3909	9.39437e-12	76
DNA_recombination(6)	24.1048	3.39951e-11	75
meiotic_cell_cycle(3)	23.7694	4.7542e-11	89
cell_cycle_process(4)	22.0724	2.5947e-10	151
multi_organism_process(2)	21.6031	4.14872e-10	86
interspecies_interaction_between_organisms(3)	18.609	8.28348e-09	24
viral_process(4)&symbiosis_encompassing_mutualism_through_parasitism(4)&viral_life_cycle(5)&viral_release_from_host_cell(5)	18.4725	9.49488e-09	23
reproduction(2)	18.0703	1.41961e-08	118
nuclear_division(5)	17.9334	1.6279e-08	90
RNA_directed_DNA_polymerase_activity(7)	17.5488	2.39134e-08	24
single_organism_catabolic_process(4)	17.4855	2.54762e-08	102
cellular_component_morphogenesis(4)	17.3149	3.02149e-08	38
organelle_fission(4)	17.1754	3.47403e-08	91
thiamine_metabolic_process(5)	16.9963	4.1552e-08	12
cell_wall_assembly(5)	16.7916	5.09942e-08	25
cellular_component_assembly_involved_in_morphogenesis(4)	16.4961	6.85201e-08	30
DNA_integration(6)	16.3504	7.92674e-08	23
RNA_DNA_hybrid_ribonuclease_activity(9)	15.8694	1.28234e-07	23
thiamine_containing_compound_metabolic_process(4)	15.7588	1.43228e-07	12
fungal_type_cell_wall_assembly(6)	15.6483	1.5996e-07	24
plasma_membrane(3)	15.5214	1.81605e-07	110
thiamine_containing_compound_biosynthetic_process(5)&thiamine_biosynthetic_process(6)	15.3215	2.218e-07	11
aspartic_type_peptidase_activity(6)&aspartic_type_endopeptidase_activity(7)	15.2133	2.47133e-07	24
cell_periphery(3)	14.9796	3.12221e-07	145
RNA_dependent_DNA_replication(7)	14.8091	3.70233e-07	28
ascospore_wall_assembly(4)&spore_wall_assembly(4)&spore_wall_biogenesis(5)&ascospore_wall_biogenesis(5)	14.5275	4.90668e-07	23
retrotransposon_nucleocapsid(5)	14.5275	4.90668e-07	23
meiotic_nuclear_division(4)	14.509	4.99834e-07	51
substrate_specific_transmembrane_transporter_activity(4)	14.2774	6.30099e-07	79
transposition_RNA_mediated(5)	14.1524	7.14e-07	27
substrate_specific_transporter_activity(3)	14.1279	7.31663e-07	91
endonuclease_activity_active_with_either_ribo_or_deoxyribonucleic_acids_and_producing_5_phosphomonoesters(7)	14.1083	7.4621e-07	29
reproductive_process_in_single_celled_organism(3)	14.1072	7.47032e-07	46
meiosis_I(5)	13.9553	8.69558e-07	34
DNA_polymerase_activity(6)	13.8461	9.69905e-07	26
transmembrane_transporter_activity(3)	13.7072	1.11439e-06	85
cation_transmembrane_transporter_activity(6)	13.4003	1.51475e-06	47
extracellular_region(2)	13.2935	1.68537e-06	32
DNA_directed_DNA_polymerase_activity(7)	13.1893	1.87043e-06	25
organonitrogen_compound_catabolic_process(5)	12.9776	2.31151e-06	35
transposition(4)	12.8321	2.67351e-06	27
endoribonuclease_activity_producing_5_phosphomonoesters(8)	12.8309	2.67671e-06	26
cellular_developmental_process(4)	12.5651	3.4917e-06	63
anatomical_structure_morphogenesis(3)&anatomical_structure_development(3)	12.4719	3.83271e-06	56
transporter_activity(2)	12.4519	3.91012e-06	100
multi_organism_cellular_process(3)	12.435	3.97683e-06	51
ion_transmembrane_transporter_activity(5)	12.4228	4.02569e-06	60
transmembrane_transport(4)	12.1536	5.26916e-06	93
DNA_biosynthetic_process(6)	11.4234	1.09368e-05	28
endoribonuclease_activity(7)	11.4234	1.09368e-05	28
developmental_process(2)	11.2709	1.27388e-05	75
endonuclease_activity(6)	11.1473	1.44145e-05	37
single_organism_developmental_process(3)	10.9958	1.67728e-05	74
meiotic_chromosome_segregation(5)	10.9204	1.80852e-05	21
fungal_type_cell_wall(5)	10.9202	1.80887e-05	31
anatomical_structure_formation_involved_in_morphogenesis(3)	10.8179	2.00369e-05	48
reproduction_of_a_single_celled_organism(3)	10.7666	2.10914e-05	53
developmental_process_involved_in_reproduction(3)&single_organism_reproductive_process(3)	10.7217	2.206e-05	45
sister_chromatid_segregation(5)	10.5808	2.53999e-05	34
fungal_type_cell_wall_biogenesis(5)	10.567	2.57521e-05	27
ascospore_formation(4)&cell_development(4)	10.4642	2.85409e-05	33
condensed_chromosome(6)	10.4174	2.99079e-05	36
sporulation_resulting_in_formation_of_a_cellular_spore(4)	10.3653	3.15084e-05	46
condensed_nuclear_chromosome(6)	10.35	3.19926e-05	32
cell_differentiation(5)	10.3204	3.29527e-05	53
reciprocal_meiotic_recombination(4)&reciprocal_DNA_recombination(7)	10.2912	3.39289e-05	22
sexual_sporulation(4)&sexual_sporulation_resulting_in_formation_of_a_cellular_spore(5)	10.1676	3.83939e-05	34
cell_wall_biogenesis(4)	10.13	3.98638e-05	30
chromosome_segregation(4)	10.0216	4.44317e-05	51
anchored_component_of_membrane(3)	9.9957	4.55956e-05	22
sporulation(4)	9.88644	5.08599e-05	46
external_encapsulating_structure(3)&cell_wall(4)	9.80687	5.50722e-05	31
chromosome_organization_involved_in_meiosis(5)	9.75398	5.80633e-05	16
organic_acid_catabolic_process(5)&carboxylic_acid_catabolic_process(6)	9.69323	6.16999e-05	28
small_molecule_catabolic_process(5)	9.64215	6.49336e-05	33
inorganic_cation_transmembrane_transporter_activity(7)	9.60562	6.73493e-05	37
hydrolase_activity_acting_on_ester_bonds(4)	9.56917	6.9849e-05	73
purine_nucleoside_triphosphate_biosynthetic_process(7)&purine_ribonucleoside_triphosphate_biosynthetic_process(8)	9.47616	7.66576e-05	11
carboxylic_acid_metabolic_process(6)	9.46435	7.75682e-05	89
ATP_biosynthetic_process(9)	9.36539	8.56376e-05	10
monovalent_inorganic_cation_transmembrane_transporter_activity(8)	9.24801	9.63027e-05	28
reproductive_process(2)	9.24254	9.68318e-05	64
glycolytic_process(4)	9.18723	0.000102338	14
monovalent_inorganic_cation_transport(6)	9.1504	0.000106178	29
cellular_amino_acid_catabolic_process(5)	9.09868	0.000111813	21
organonitrogen_compound_metabolic_process(4)	9.08338	0.000113538	124
sexual_reproduction(3)&multi_organism_reproductive_process(3)	9.03483	0.000119186	57
DNA_metabolic_process(5)	9.02419	0.000120461	112
oxoacid_metabolic_process(5)	9.00121	0.000123261	91
monocarboxylic_acid_metabolic_process(7)	8.9982	0.000123632	41
regulation_of_cell_morphogenesis(4)	8.92957	0.000132414	11
organic_acid_metabolic_process(4)	8.90993	0.000135041	91
mismatch_repair_complex(4)	8.84142	0.000144618	7
mismatched_DNA_binding(8)	8.84142	0.000144618	7
DNA_replication(6)	8.79098	0.000152099	52
external_encapsulating_structure_organization(3)&cell_wall_organization(4)	8.79098	0.000152099	52
regulation_of_cell_shape(4)	8.65755	0.000173809	9
regulation_of_cell_division(4)	8.62595	0.000179389	35
cell_cycle_checkpoint(5)	8.58796	0.000186336	26
regulation_of_nuclear_division(5)	8.51997	0.000199445	33
inorganic_anion_transmembrane_transporter_activity(7)	8.49784	0.000203909	13
mitotic_sister_chromatid_segregation(6)	8.47959	0.000207664	30
pyruvate_metabolic_process(8)	8.35174	0.000235986	17
ion_transmembrane_transport(5)	8.24767	0.000261868	38
regulation_of_cell_cycle_process(5)	8.23974	0.000263952	40
glutamine_family_amino_acid_catabolic_process(7)	8.21582	0.000270343	10
organophosphate_catabolic_process(5)	8.03923	0.000322559	14
pyrimidine_containing_compound_biosynthetic_process(6)	8.03923	0.000322559	14
pyrimidine_containing_compound_metabolic_process(5)	8.01657	0.000329949	15
nucleobase_transport(4)&nucleobase_transmembrane_transporter_activity(6)	7.97043	0.000345531	7
synaptonemal_complex(6)	7.97043	0.000345531	7
meiosis_II(5)&meiotic_sister_chromatid_segregation(6)	7.94757	0.00035352	8
ATP_binding(6)	7.90743	0.000368	131
adenyl_ribonucleotide_binding(6)	7.83993	0.000393695	131
microtubule_cytoskeleton(6)	7.82112	0.000401172	34
nucleoside_triphosphate_biosynthetic_process(6)	7.80882	0.000406136	12
negative_regulation_of_mitotic_nuclear_division(5)	7.72067	0.000443565	16
carbohydrate_catabolic_process(5)	7.70444	0.000450823	27
inorganic_ion_transmembrane_transport(5)	7.65366	0.000474306	28
ribonuclease_activity(6)	7.65366	0.000474306	28
adenyl_nucleotide_binding(6)	7.57387	0.000513699	131
purine_ribonucleoside_triphosphate_metabolic_process(8)	7.55933	0.000521225	18
chromosome_organization(4)	7.52479	0.000539545	106
ribonucleoside_triphosphate_biosynthetic_process(7)	7.52456	0.000539666	11
ATP_metabolic_process(8)	7.48854	0.000559461	17
inorganic_cation_transmembrane_transport(5)	7.44148	0.000586414	25
active_transmembrane_transporter_activity(4)	7.35349	0.000640351	34
ammonium_transmembrane_transporter_activity(5)&organic_cation_transmembrane_transporter_activity(7)	7.3276	0.000657151	8
single_organism_carbohydrate_catabolic_process(5)	7.31234	0.000667257	24
microtubule_cytoskeleton_organization(5)	7.24295	0.000715198	30
cation_transmembrane_transport(6)	7.19853	0.000747687	26
mitotic_nuclear_division(5)	7.15607	0.000780115	50
glutamine_family_amino_acid_metabolic_process(6)	7.15512	0.000780853	19
negative_regulation_of_nuclear_division(5)	7.14945	0.000785299	21
regulation_of_anatomical_structure_morphogenesis(4)	7.12027	0.000808547	11
chromosomal_region(5)	7.07648	0.000844739	37
condensed_nuclear_chromosome_centromeric_region(6)	7.05709	0.000861279	18
purine_nucleoside_triphosphate_metabolic_process(7)	7.05709	0.000861279	18
secondary_active_transmembrane_transporter_activity(5)	7.05709	0.000861279	18
fungal_type_cell_wall_organization(5)	6.9546	0.000954236	38
negative_regulation_of_cell_division(4)	6.93719	0.000970993	21
spindle(5)	6.93519	0.000972938	29
alpha_amino_acid_catabolic_process(6)	6.8847	0.00102332	16
maintenance_of_DNA_repeat_elements(4)	6.82697	0.00108414	10
mismatch_repair(5)	6.82697	0.00108414	10
mitotic_recombination(7)	6.81899	0.00109283	18
condensed_chromosome_centromeric_region(7)	6.81744	0.00109452	20
anion_transmembrane_transporter_activity(6)	6.81251	0.00109993	27
ammonium_transport(6)	6.77629	0.00114049	8
mitochondrial_proton_transporting_ATP_synthase_complex(4)&proton_transporting_ATP_synthase_complex(4)&energy_coupled_proton_transport_down_electrochemical_gradient(7)&ATP_synthesis_coupled_proton_transport(8)&proton_transporting_ATP_synthase_activity_rotational_mechanism(8)	6.77629	0.00114049	8
negative_regulation_of_sister_chromatid_segregation(5)&negative_regulation_of_mitotic_sister_chromatid_segregation(6)	6.75911	0.00116026	14
small_molecule_biosynthetic_process(5)	6.74739	0.00117394	66
vitamin_metabolic_process(5)&water_soluble_vitamin_metabolic_process(6)	6.71969	0.00120691	17
ion_transport(4)	6.66856	0.00127022	68
microtubule_organizing_center(5)&spindle_pole_body(6)	6.66152	0.0012792	22
regulation_of_sister_chromatid_segregation(5)&regulation_of_mitotic_sister_chromatid_segregation(6)	6.62799	0.00132283	16
vitamin_biosynthetic_process(4)&water_soluble_vitamin_biosynthetic_process(5)	6.62799	0.00132283	16
cytogamy(4)	6.60187	0.00135782	7
double_strand_break_repair_via_synthesis_dependent_strand_annealing(7)	6.60187	0.00135782	7
iron_coordination_entity_transport(4)	6.60187	0.00135782	7
ribonucleoside_triphosphate_metabolic_process(7)	6.58905	0.00137535	18
telomere_maintenance(4)&anatomical_structure_homeostasis(5)	6.47048	0.00154848	22
glutamine_family_amino_acid_biosynthetic_process(7)	6.3889	0.0016801	11
sister_chromatid_cohesion(5)	6.38129	0.00169294	16
microtubule_based_process(4)	6.31946	0.00180092	31
regulation_of_mitotic_metaphase_anaphase_transition(6)&regulation_of_metaphase_anaphase_transition_of_cell_cycle(7)	6.28843	0.00185767	15
telomere_organization(5)	6.28464	0.00186473	22
cation_transport(5)	6.28132	0.00187093	41
cell_wall_organization_or_biogenesis(3)	6.22123	0.00198679	55
negative_regulation_of_chromosome_segregation(4)	6.20566	0.00201797	14
endopeptidase_activity(6)	6.16389	0.00210405	28
nuclease_activity(5)	6.16363	0.0021046	37
regulation_of_mitotic_nuclear_division(6)	6.10382	0.00223432	22
regulation_of_chromosome_segregation(4)	6.07329	0.00230357	19
lipase_activity(5)	6.06557	0.00232144	10
regulation_of_cell_cycle(4)	6.0064	0.00246293	48
condensed_chromosome_kinetochore(5)	5.94482	0.00261938	18
negative_regulation_of_cell_cycle_process(4)	5.92788	0.00266413	22
nucleoside_triphosphate_metabolic_process(6)	5.87708	0.00280297	19
regulation_of_mitotic_spindle_organization(6)&regulation_of_spindle_organization(6)	5.86887	0.00282607	6
alpha_amino_acid_metabolic_process(5)	5.86696	0.00283146	42
negative_regulation_of_mitotic_sister_chromatid_separation(5)&spindle_checkpoint(6)&negative_regulation_of_mitotic_metaphase_anaphase_transition(6)&mitotic_spindle_checkpoint(6)&negative_regulation_of_metaphase_anaphase_transition_of_cell_cycle(6)	5.86396	0.00283996	13
transferase_activity_transferring_phosphorus_containing_groups(4)	5.81837	0.00297245	75
metaphase_anaphase_transition_of_mitotic_cell_cycle(5)&metaphase_anaphase_transition_of_cell_cycle(6)&mitotic_sister_chromatid_separation(6)&regulation_of_mitotic_sister_chromatid_separation(7)	5.80505	0.00301231	15
DNA_binding(5)	5.74494	0.00319893	112
chromosome_centromeric_region(6)	5.72382	0.00326721	24
lipid_catabolic_process(5)	5.69644	0.00335789	16
purine_nucleoside_monophosphate_metabolic_process(7)&purine_ribonucleoside_monophosphate_metabolic_process(8)	5.64383	0.0035393	20
negative_regulation_of_proteasomal_ubiquitin_dependent_protein_catabolic_process(6)	5.60489	0.00367981	13
regulation_of_proteasomal_ubiquitin_dependent_protein_catabolic_process(8)	5.57796	0.00378026	15
arginine_metabolic_process(7)	5.55865	0.00385398	7
establishment_of_mitotic_sister_chromatid_cohesion(6)	5.55865	0.00385398	7
oxidoreductase_activity(3)	5.51942	0.00400818	68
phosphotransferase_activity_alcohol_group_as_acceptor(5)	5.4884	0.00413446	43
cytochrome_complex(4)	5.4295	0.00438529	8
spindle_pole(5)	5.42782	0.00439266	22
chromosome_separation(5)	5.41502	0.00444926	17
generation_of_precursor_metabolites_and_energy(4)	5.40372	0.00449981	41
fungal_type_cell_wall_organization_or_biogenesis(4)	5.36226	0.0046903	40
condensed_nuclear_chromosome_kinetochore(6)	5.35995	0.00470114	15
negative_regulation_of_proteasomal_protein_catabolic_process(6)	5.35805	0.00471007	13
purine_nucleoside_monophosphate_biosynthetic_process(7)&purine_ribonucleoside_monophosphate_biosynthetic_process(8)	5.35805	0.00471007	13
oxidation_reduction_process(4)	5.32509	0.0048679	84
nucleobase_containing_small_molecule_metabolic_process(4)	5.295	0.00501659	51
carbohydrate_metabolic_process(4)	5.29359	0.00502368	68
plasma_membrane_part(3)	5.26993	0.00514395	22
nucleoside_phosphate_metabolic_process(5)	5.18803	0.005583	45
microtubule_organizing_center_organization(4)&spindle_pole_body_organization(5)	5.17475	0.00565762	11
ascospore_wall(6)	5.12193	0.00596447	7
cell_division(4)	5.09423	0.00613202	71
regulation_of_chromosome_organization(5)	5.08686	0.00617741	29
regulation_of_mitotic_cell_cycle(5)	5.08686	0.00617741	29
oxidoreductase_activity_acting_on_the_aldehyde_or_oxo_group_of_donors_NAD_or_NADP_as_acceptor(5)	5.05915	0.00635097	8
nucleotide_metabolic_process(6)	5.0473	0.00642668	44
hydrolase_activity_acting_on_carbon_nitrogen_but_not_peptide_bonds(4)	4.98356	0.00684966	19
anaphase_promoting_complex_dependent_proteasomal_ubiquitin_dependent_protein_catabolic_process(8)	4.94937	0.00708787	15
regulation_of_proteasomal_protein_catabolic_process(7)	4.94937	0.00708787	15
steroid_metabolic_process(5)&sterol_metabolic_process(6)	4.94937	0.00708787	15
organic_hydroxy_compound_metabolic_process(4)	4.90916	0.0073787	34
negative_regulation_of_protein_catabolic_process(5)&negative_regulation_of_cellular_protein_catabolic_process(6)&negative_regulation_of_proteolysis_involved_in_cellular_protein_catabolic_process(7)	4.89812	0.00746061	13
alcohol_metabolic_process(5)	4.87628	0.00762532	30
negative_regulation_of_cell_cycle(4)	4.8464	0.00785661	24
biological_adhesion(2)&cell_adhesion(3)	4.82901	0.00799441	6
carbon_nitrogen_lyase_activity(4)	4.82901	0.00799441	6
prospore_membrane(3)&intracellular_immature_spore(3)&ascospore_type_prospore(4)	4.82094	0.00805921	19
organonitrogen_compound_biosynthetic_process(5)	4.7816	0.00838258	74
cell_morphogenesis(5)	4.77886	0.00840558	12
mitotic_sister_chromatid_cohesion(6)	4.77886	0.00840558	12
synapsis(6)	4.75841	0.00857926	9
establishment_of_sister_chromatid_cohesion(5)	4.72953	0.00883061	7
microtubule_nucleation(6)	4.72953	0.00883061	7
spore_wall(5)	4.72953	0.00883061	7
regulation_of_meiosis(5)	4.68371	0.00924463	13
kinetochore(4)	4.67086	0.00936423	18
carbohydrate_derivative_catabolic_process(5)	4.66646	0.00940548	11
chromosome(5)	4.60043	0.0100475	80
regulation_of_cellular_protein_catabolic_process(6)&regulation_of_proteolysis_involved_in_cellular_protein_catabolic_process(7)	4.57005	0.0103574	15
cell_aggregation(2)&aggregation_of_unicellular_organisms(3)	4.5652	0.0104078	5
meiotic_cell_cycle_checkpoint(4)	4.5652	0.0104078	5
polyamine_transmembrane_transporter_activity(5)	4.5652	0.0104078	5
telomere_capping(5)	4.5652	0.0104078	5
microtubule_polymerization(7)	4.56368	0.0104236	10
single_organism_carbohydrate_metabolic_process(4)	4.55823	0.0104806	57
regulation_of_developmental_process(3)	4.55582	0.0105059	12
negative_regulation_of_mitotic_cell_cycle(5)	4.52054	0.0108831	17
purine_containing_compound_metabolic_process(5)	4.49833	0.0111275	29
negative_regulation_of_mitotic_cell_cycle_phase_transition(6)	4.47889	0.0113459	13
regulation_of_meiotic_cell_cycle(4)	4.47889	0.0113459	13
purine_nucleotide_metabolic_process(6)	4.42881	0.0119287	23
nicotinamide_nucleotide_metabolic_process(7)	4.42611	0.0119609	14
NADP_metabolic_process(8)	4.40743	0.0121864	8
RNA_phosphodiester_bond_hydrolysis_endonucleolytic(7)	4.39222	0.0123732	26
hydrogen_ion_transmembrane_transport(6)	4.39122	0.0123856	15
purine_nucleobase_metabolic_process(6)	4.37484	0.0125901	7
proton_transport(5)	4.35939	0.0127861	17
negative_regulation_of_organelle_organization(4)	4.32065	0.0132913	30
kinase_activity(5)	4.31157	0.0134125	45
pyridine_nucleotide_metabolic_process(6)	4.24343	0.0143583	14
negative_regulation_of_chromosome_organization(5)	4.23341	0.0145029	20
DNA_repair_complex(4)	4.21153	0.0148237	11
microtubule_polymerization_or_depolymerization(6)	4.21153	0.0148237	11
mitotic_spindle_assembly_checkpoint(7)&spindle_assembly_checkpoint(7)	4.21043	0.01484	9
regulation_of_mitotic_cell_cycle_phase_transition(6)	4.20677	0.0148944	16
hydrogen_ion_transmembrane_transporter_activity(9)	4.20364	0.0149411	17
hydrogen_transport(4)	4.20364	0.0149411	17
pyridine_containing_compound_metabolic_process(5)	4.20364	0.0149411	17
chromosomal_part(4)	4.17049	0.0154447	72
cellular_amino_acid_metabolic_process(4)	4.16439	0.0155391	51
anion_transport(5)	4.15311	0.0157154	35
inorganic_anion_transport(6)	4.14151	0.0158988	12
ribonucleoside_monophosphate_metabolic_process(7)	4.12167	0.0162174	21
organophosphate_metabolic_process(4)	4.10455	0.0164975	73
negative_regulation_of_cell_cycle_phase_transition(5)	4.09595	0.0166399	13
alpha_glucosidase_activity(7)	4.0908	0.0167259	5
arginine_biosynthetic_process(8)	4.0908	0.0167259	5
iron_ion_transmembrane_transporter_activity(10)	4.0908	0.0167259	5
mitochondrial_proton_transporting_ATP_synthase_complex_coupling_factor_F_o_(4)&proton_transporting_ATP_synthase_complex_coupling_factor_F_o_(4)	4.0908	0.0167259	5
solute_cation_symporter_activity(7)	4.0908	0.0167259	5
homologous_chromosome_segregation(6)	4.08407	0.0168387	10
regulation_of_microtubule_based_process(4)&regulation_of_microtubule_cytoskeleton_organization(5)	4.08407	0.0168387	10
telomere_maintenance_via_recombination(5)	4.08407	0.0168387	10
drug_transporter_activity(3)	4.05265	0.0173763	7
regulation_of_protein_catabolic_process(5)	4.04933	0.0174341	16
primary_alcohol_metabolic_process(6)&ethanol_metabolic_process(7)	4.02884	0.017795	6
ribose_phosphate_metabolic_process(5)	4.0262	0.0178419	28
nuclear_chromosome(5)	3.97244	0.0188274	59
mitotic_cell_cycle_process(5)	3.9444	0.0193628	70
double_stranded_DNA_binding(7)	3.91688	0.0199031	13
purine_nucleoside_biosynthetic_process(7)&purine_ribonucleoside_biosynthetic_process(8)	3.91688	0.0199031	13
mitotic_cell_cycle_phase_transition(6)	3.91486	0.0199434	30
regulation_of_cellular_catabolic_process(5)	3.90081	0.0202255	25
negative_regulation_of_catabolic_process(4)&negative_regulation_of_cellular_catabolic_process(5)	3.89988	0.0202443	14
regulation_of_cell_cycle_phase_transition(6)	3.89742	0.0202941	16
glutamine_metabolic_process(7)	3.85282	0.0212197	8
mitochondrial_respiratory_chain(4)	3.85282	0.0212197	8
cation_transporting_ATPase_activity(7)	3.80287	0.0223066	11
organic_acid_biosynthetic_process(5)&carboxylic_acid_biosynthetic_process(6)	3.78382	0.0227356	38
sugar_transmembrane_transporter_activity(5)	3.75874	0.023313	7
glycosyl_compound_biosynthetic_process(5)	3.75084	0.0234979	16
nucleoside_monophosphate_metabolic_process(6)	3.74959	0.0235274	21
negative_regulation_of_protein_processing(6)&negative_regulation_of_proteolysis(6)	3.74552	0.0236234	13
phosphorylation(6)	3.74261	0.0236921	64
anion_transmembrane_transport(6)	3.74085	0.023734	15
purine_nucleotide_biosynthetic_process(7)	3.74085	0.023734	15
integral_component_of_plasma_membrane(4)	3.73209	0.0239426	9
respiratory_chain(3)	3.73209	0.0239426	9
protein_serine_threonine_kinase_activity(7)	3.72339	0.024152	28
transferase_activity_transferring_acyl_groups(4)	3.72339	0.024152	28
glucose_transmembrane_transporter_activity(8)	3.69315	0.0248934	6
spindle_pole_body_duplication(5)	3.69315	0.0248934	6
sulfur_compound_biosynthetic_process(5)	3.6846	0.0251072	19
gene_conversion_at_mating_type_locus(5)	3.68288	0.0251505	5
polyamine_transport(4)	3.68288	0.0251505	5
purine_ribonucleotide_metabolic_process(7)	3.63227	0.0264561	21
cell_cycle_phase_transition(5)	3.63148	0.0264768	30
regulation_of_catabolic_process(4)	3.62996	0.0265173	26
organic_hydroxy_compound_transport(4)	3.61405	0.0269425	11
attachment_of_spindle_microtubules_to_kinetochore(5)&microtubule_anchoring(6)	3.60571	0.0271682	8
mitotic_cell_cycle(5)	3.60022	0.0273178	71
double_strand_break_repair_via_homologous_recombination(6)	3.59313	0.0275121	15
N_acetyltransferase_activity(7)	3.59047	0.0275854	12
carbohydrate_transport(4)	3.59047	0.0275854	12
regulation_of_protein_processing(6)	3.58147	0.0278349	13
negative_regulation_of_cellular_component_organization(3)	3.54083	0.0289892	30
nucleotidyltransferase_activity(5)	3.53216	0.0292417	28
regulation_of_proteolysis(6)	3.45087	0.031718	15
ribonucleoside_monophosphate_biosynthetic_process(7)	3.43421	0.032251	14
N_acyltransferase_activity(6)	3.42437	0.0325699	13
disaccharide_catabolic_process(5)	3.3916	0.0336549	6
meiotic_DNA_double_strand_break_formation(4)	3.3916	0.0336549	6
monosaccharide_transmembrane_transporter_activity(6)&hexose_transmembrane_transporter_activity(7)	3.3916	0.0336549	6
negative_regulation_of_exit_from_mitosis(5)	3.3916	0.0336549	6
one_carbon_metabolic_process(4)	3.3916	0.0336549	6
symporter_activity(6)	3.3916	0.0336549	6
transferase_activity_transferring_acyl_groups_other_than_amino_acyl_groups(5)	3.39	0.0337088	23
acetyl_CoA_L_lysine_N6_acetyltransferase(8)&histone_acetyltransferase_activity(9)	3.37611	0.03418	8
cyclin_dependent_protein_serine_threonine_kinase_regulator_activity(5)	3.37611	0.03418	8
organic_hydroxy_compound_transmembrane_transporter_activity(4)	3.34078	0.0354092	4
respiratory_chain_complex_III(3)&mitochondrial_respiratory_chain_complex_III(4)	3.34078	0.0354092	4
DNA_secondary_structure_binding(7)	3.32777	0.0358731	5
maltose_metabolic_process(5)	3.32777	0.0358731	5
acetyltransferase_activity(6)	3.31385	0.0363757	15
mitotic_cell_cycle_checkpoint(6)	3.29105	0.0372148	14
nuclear_chromosome_part(5)	3.28038	0.0376141	52
carbohydrate_transporter_activity(3)&carbohydrate_transmembrane_transporter_activity(4)	3.24261	0.0390617	7
microtubule_associated_complex(4)	3.24261	0.0390617	7
transferase_activity_transferring_nitrogenous_groups(4)&transaminase_activity(5)	3.24261	0.0390617	7
hexose_metabolic_process(6)	3.21189	0.0402805	19
regulation_of_cellular_component_organization(3)	3.18285	0.0414672	72
organic_acid_transport(4)	3.16998	0.0420043	18
glucosidase_activity(6)	3.16242	0.0423231	8
oxidoreductase_activity_acting_on_the_aldehyde_or_oxo_group_of_donors(4)	3.16242	0.0423231	8
amino_acid_transmembrane_transport(6)	3.121	0.0441132	9
gluconeogenesis(8)	3.121	0.0441132	9
nucleobase_containing_compound_transmembrane_transporter_activity(5)	3.121	0.0441132	9
regulation_of_cyclin_dependent_protein_serine_threonine_kinase_activity(5)	3.121	0.0441132	9
alpha_amino_acid_biosynthetic_process(6)	3.12079	0.0441224	27
oligosaccharide_catabolic_process(6)	3.11932	0.0441873	6
positive_regulation_of_lipid_metabolic_process(4)	3.11932	0.0441873	6
intrinsic_component_of_plasma_membrane(4)	3.10363	0.0448861	10
ATPase_activity_coupled_to_transmembrane_movement_of_ions(6)	3.10222	0.0449493	11
carboxylic_ester_hydrolase_activity(5)	3.10222	0.0449493	11
purine_containing_compound_biosynthetic_process(6)	3.091	0.0454563	16
protein_kinase_activity(6)	3.08905	0.0455454	28
cytoskeleton(5)	3.07931	0.0459911	46
nucleoside_monophosphate_biosynthetic_process(6)	3.02129	0.0487385	14
ribonucleoside_biosynthetic_process(7)	3.02129	0.0487385	14
carbohydrate_phosphorylation(5)&carbohydrate_kinase_activity(6)	3.01564	0.0490145	5
protein_localization_to_chromosome_centromeric_region(8)	3.01564	0.0490145	5
