# Supplementary material for: Transcriptomic analysis of nonylphenol effect on Saccharomyces cerevisiae
Source: PeerJ. 2021 Feb 11;9:e10794. doi: 10.7717/peerj.10794 (PMC7882136; doi:10.7717/peerj.10794)
Supplement: Supplemental Information 7 [file peerj-09-10794-s007.xlsx]

## Sheet: Sayfa1
Round 1
Time	Control 1	Control 2	Control 3	Control Average	Control standart deviation		0,1 mg/l 1	0,1 mg/l 2	0,1 mg/l 3	0,1 mg/l Average	0,1 mg/l standart deviation		1 mg/l 1	1 mg/l 2	1 mg/l 3	1 mg/l Average	1 mg/l standart deviation		2 mg/l 1	2 mg/l 2	2 mg/l 3	2 mg/l Average	2 mg/l standart deviation
0	0.1475	0.1485	0.154	0.15	0.0035		0.149	0.149	0.142	0.146667	0.00404145		0.148	0.1465	0.145	0.1465	0.0015		0.147	0.1475	0.144	0.146167	0.00189297
4	0.286	0.296	0.316	0.299333	0.0152753		0.284	0.304	0.288	0.292	0.010583		0.284	0.288	0.288	0.286667	0.0023094		0.22	0.212	0.202	0.211333	0.0090185
8	1.515	1.58	1.65	1.58167	0.0675154		1.47	1.59	1.51	1.52333	0.061101		1.415	1.43	1.52	1.455	0.0567891		0.75	0.725	0.73	0.735	0.0132288
12	7.4125	7.7	7.625	7.57917	0.149129		6.9375	6.9	7.2375	7.025	0.184983		6.6875	6.5	7.275	6.82083	0.404338		3.7125	3.35	3.025	3.3625	0.34392
16	13.06	12.54	12.56	12.72	0.294618		12.24	12.32	12.16	12.24	0.08		12.2	12.62	13.64	12.82	0.74054		10.9	10.22	10.06	10.3933	0.446019
20	14.04	13.2	13.62	13.62	0.42		13.74	13.46	13.5	13.5667	0.151438		13.52	13.52	14.44	13.8267	0.531162		12.62	12.82	12.92	12.7867	0.152753
22	14.32	14.56	14.2	14.36	0.183303		13.92	14.32	13.96	14.0667	0.220303		14.04	14.76	15.12	14.64	0.549909		13.32	13.48	14.1	13.6333	0.411987
Round 10
Time	Control 1	Control 2	Control 3	Control Average	Control standart deviation		0,1 mg/l 1	0,1 mg/l 2	0,1 mg/l 3	0,1 mg/l Average	0,1 mg/l standart deviation		1 mg/l 1	1 mg/l 2	1 mg/l 3	1 mg/l Average	1 mg/l standart deviation		2 mg/l 1/10	2 mg/l 2/10	2 mg/l 3/10	2 mg/l Average	2 mg/l standart deviation
0	0.14	0.139	0.1405	0.139833	0.000763763		0.143	0.145	0.142	0.143333	0.00152753		0.1425	0.144	0.1465	0.144333	0.00202073		0.148	0.138	0.1455	0.143833	0.00520416
4	0.39	0.392	0.432	0.404667	0.0236925		0.39	0.42	0.408	0.406	0.0150997		0.388	0.388	0.408	0.394667	0.011547		0.36	0.292	0.34	0.330667	0.0349476
8	2.2	2.275	2.27	2.24833	0.0419325		2.19	2.15	2.27	2.20333	0.061101		2.115	2.065	2.22	2.13333	0.0791096		1.48	1.36	1.56	1.46667	0.100664
12	8.25	8.25	8.3	8.26667	0.0288675		7.975	8.15	8.225	8.11667	0.12829		8.025	7.95	8.15	8.04167	0.101036		6.4	5.95	6.275	6.20833	0.232289
16	12.16	12.32	10.92	11.8	0.76629		11.2	11.68	10.96	11.28	0.366606		11.76	11.64	11.92	11.7733	0.140475		11.46	10.96	12.12	11.5133	0.581836
20	12.88	13	12.88	12.92	0.069282		12.44	11.88	12.64	12.32	0.393954		11.96	11.44	12.24	11.88	0.405956		11.8	11.96	12.13	11.9633	0.165025
22	13.48	12.96	13.56	13.3333	0.325781		12.5	12.84	13.4	12.9133	0.454459		13.2	12.4	13.1	12.9	0.43589		12.8	12.74	12.6	12.7133	0.102632
Round 20
Time	Control 1	Control 2	Control 3	Control Average	Control standart deviation		0,1 mg/l 1	0,1 mg/l 2	0,1 mg/l 3	0,1 mg/l Average	0,1 mg/l standart deviation		1 mg/l 1	1 mg/l 2	1 mg/l 3	1 mg/l Average	1 mg/l standart deviation		2 mg/l 1/20	2 mg/l 2/20	2 mg/l 3/20	2 mg/l Average	2 mg/l standart deviation
0	0.212	0.197	0.209	0.206	0.00793725		0.221	0.21	0.217	0.216	0.00556776		0.189	0.201	0.2045	0.198167	0.00812917		0.186	0.164	0.2035	0.1845	0.0197927
4	0.556	0.568	0.572	0.565333	0.00832666		0.58	0.552	0.56	0.564	0.0144222		0.488	0.6	0.604	0.564	0.0658483		0.308	0.356	0.412	0.358667	0.0520513
8	3.07	3.193	3.35	3.20433	0.140344		3.41	3.183	3.253	3.282	0.116245		2.83	2.74	3.27	2.94667	0.283608		1.01	1.04	1.56	1.20333	0.309246
12	11.425	11.6	11.9	11.6417	0.240226		11.275	11.25	11.975	11.5	0.411552		10.875	9.6875	11.5	10.6875	0.920682		5.35	5.45	6.08	5.62667	0.395769
20	16.48	15.8	15.8	16.0267	0.392598		14.96	15.84	16.12	15.64	0.60531		15.44	16	16.12	15.8533	0.362951		14.4	14.8	15.12	14.7733	0.36074
22	17.52	16.52	17.04	17.0267	0.500133		16.6	17.48	17.24	17.1067	0.454899		16.92	17.12	17.4	17.1467	0.241109		16.24	15.88	16.28	16.1333	0.220303
Round 30
Time	Control 1	Control 2	Control 3	Control Average	Control standart deviation		0,1 mg/l 1	0,1 mg/l 2	0,1 mg/l 3	0,1 mg/l Average	0,1 mg/l standart deviation		1 mg/l 1	1 mg/l 2	1 mg/l 3	1 mg/l Average	1 mg/l standart deviation		2 mg/l 1/30	2 mg/l 2/30	2 mg/l 3/30	2 mg/l Average	2 mg/l standart deviation
0	0.1685	0.171	0.161	0.166833	0.00520416		0.169	0.171	0.163	0.167667	0.00416333		0.1685	0.1435	0.1615	0.157833	0.012897		0.17	0.175	0.18	0.175	0.005
4	1.06	1.222	1.16	1.14733	0.0817394		1.34	1.17	1.156	1.222	0.10243		0.628	0.58	0.688	0.632	0.054111		0.804	0.632	0.696	0.710667	0.0869329
8	6.35	7.12	6.8	6.75667	0.386825		7.24	6.9	6.85	6.99667	0.212211		3.35	3.07	4.32	3.58	0.655973		3.36	3.09	3.76	3.40333	0.337095
12	13.05	13.3625	11.9375	12.7833	0.748992		13.1	14.25	13.625	13.6583	0.575724		13.025	12.225	14.05	13.1	0.914809		13.225	12.8375	13.8125	13.2917	0.490907
16	19	18.6	18.88	18.8267	0.205264		18.32	20.14	17.36	18.6067	1.412		16.28	17.22	17.16	16.8867	0.526245		16.88	16.68	16.16	16.5733	0.371663
20	19.4	18.88	19.24	19.1733	0.266333		17.44	18.76	17.62	17.94	0.715821		17.14	17.46	17.28	17.2933	0.160416		17.24	17.2	17.68	17.3733	0.266333
22	19.48	18.54	20.78	19.6	1.12481		18.08	21.14	18.12	19.1133	1.75526		18.26	18.42	18.56	18.4133	0.150111		19.08	17.38	18.08	18.18	0.8544
Round 40
Time	Control 1	Control 2	Control 3	Control Average	Control standart deviation		0,1 mg/l 1	0,1 mg/l 2	0,1 mg/l 3	0,1 mg/l Average	0,1 mg/l standart deviation		1 mg/l 1	1 mg/l 2	1 mg/l 3	1 mg/l Average	1 mg/l standart deviation		2 mg/l 1/40	2 mg/l 2/40	2 mg/l 3/40	2 mg/l Average	2 mg/l standart deviation
0	0.143	0.151	0.149	0.147667	0.00416333		0.12	0.163	0.156	0.146333	0.0230723		0.135	0.126	0.116	0.125667	0.00950438		0.185	0.186	0.168	0.179667	0.010116
4	1.02	0.944	1.186	1.05	0.123758		1.12	0.93	0.818	0.956	0.15267		0.512	0.352	0.48	0.448	0.084664		0.498	0.496	0.508	0.500667	0.0064291
8	6.38	6.255	6.895	6.51	0.339227		5.44	6.245	5.705	5.79667	0.410254		4.055	2.185	3.84	3.36	1.02324		2.485	2.615	2.875	2.65833	0.198578
12	11.25	11.7	11.35	11.4333	0.236291		9.125	11.95	10.875	10.65	1.42588		10.825	10.4	10.225	10.4833	0.308558		10.7	10.75	10.85	10.7667	0.0763763
16	16.14	15.88	16.32	16.1133	0.221209		13.22	16.16	13.6	14.3267	1.59904		14.8	15.76	14.6	15.0533	0.620108		16.06	16.24	16.52	16.2733	0.231805
20	17.62	17.76	17.4	17.5933	0.181475		15.44	18	15.62	16.3533	1.42889		14.92	18.46	15.58	16.32	1.88245		18.48	17.22	17.04	17.58	0.784602
22	17.88	19.64	18.94	18.82	0.886115		17.88	18.28	18.26	18.14	0.225389		15.3	18.78	18.04	17.3733	1.83328		18.8	19.64	17.92	18.7867	0.860078
			1 döngü								Round 10
				20 döngü								Round 30
				Round 40
