# Supplementary material for: Transcriptomic analysis of nonylphenol effect on Saccharomyces cerevisiae
Source: PeerJ. 2021 Feb 11;9:e10794. doi: 10.7717/peerj.10794 (PMC7882136; doi:10.7717/peerj.10794)
Supplement: Supplemental Information 8 [file peerj-09-10794-s008.xlsx]

## Sheet: qcr7
Sample Name	act1	qcr7	DeltaCt	DeltaDeltaCt	FC	Average						Average Control	2.37
Control1	20.46	22.85	2.39	0.02	0.986233	1.00063
Control2	21.02	23.44	2.42	0.05	0.965936
Control3	21.72	24.02	2.3	-0.07	1.04972
2mg/L_1	18.17	19.92	1.75	-0.62	1.53688	2.32636
2mg/L_2	18.9	19.94	1.04	-1.33	2.51403
2mg/L_3	19.51	20.33	0.82	-1.55	2.92817

## Sheet: atp3
Sample Name	act1	atp3	DeltaCt	DeltaDeltaCt	FC	Average						Average Control	2.92333
Control1	20.46	23.44	2.98	0.0566667	0.961483	1.00071
Control2	21.02	23.96	2.94	0.0166667	0.988514
Control3	21.72	24.57	2.85	-0.0733333	1.05214
2mg/L_1	18.17	20.2	2.03	-0.893333	1.85746	2.44763
2mg/L_2	18.9	20.52	1.62	-1.30333	2.46798
2mg/L_3	19.51	20.84	1.33	-1.59333	3.01746

## Sheet: cox4
Sample Name	act1	cox4	DeltaCt	DeltaDeltaCt	FC	Average						Average Control	4.01
Control1	20.46	24.64	4.18	0.17	0.888843	1.00463
Control2	21.02	24.86	3.84	-0.17	1.12506
Control3	21.72	25.73	4.01	0	1
2mg/L_1	18.17	20.89	2.72	-1.29	2.44528	3.0557
2mg/L_2	18.9	21.33	2.43	-1.58	2.9897
2mg/L_3	19.51	21.62	2.11	-1.9	3.73213

## Sheet: sod1
Sample Name	act1	sod1	DeltaCt	DeltaDeltaCt	FC	Average						Average Control	1.93333
Control1	20.46	22.44	1.98	0.0466667	0.968171	1.00158
Control2	21.02	22.84	1.82	-0.113333	1.08172
Control3	21.72	23.72	2	0.0666667	0.954842
2mg/L_1	18.17	19.16	0.99	-0.943333	1.92297	2.41452
2mg/L_2	18.9	19.67	0.77	-1.16333	2.23974
2mg/L_3	19.51	19.82	0.31	-1.62333	3.08086

## Sheet: pdr5
Sample Name	act1	pdr5	DeltaCt	DeltaDeltaCt	FC	Average						Average Control	4.38667
Control1	20.46	24.27	3.81	-0.576667	1.4914	1.0433
Control2	21.02	25.65	4.63	0.243333	0.844791
Control3	21.72	26.44	4.72	0.333333	0.793701
2mg/L_1	18.17	21.03	2.86	-1.52667	2.88119	4.14141
2mg/L_2	18.9	21.19	2.29	-2.09667	4.2772
2mg/L_3	19.51	21.5	1.99	-2.39667	5.26585

## Sheet: Pearson
	Fold change
Gene	Relal-time RT-PCR	RNASeq
QCR7	2.33	1.79			0.970225		0.941118
ATP3	2.45	1.74
COX4	3.06	1.85
SOD1	2.41	1.71
PDR5	4.14	2.17
